# Supplementary material for: Synthesis and Evaluation of Small Molecule Drug Conjugates Harnessing Thioester-Linked Maytansinoids
Source: MDPI journal article supplement (doi:10.3390/pharmaceutics14071316), 2022-06-21

## **Supporting Information**

### **Synthesis and Evaluation of Small Molecule Drug Conjugates**

#### **Harnessing Thioester-linked Maytansinoids**

Chen-Fu Lo<sup>1#</sup>, Tai-Yu Chiu<sup>1#</sup>, Yu-Tzu Liu<sup>2#</sup>, Li-Rung Huang<sup>2#</sup>, Teng-Kuang Yeh<sup>1#</sup>, Kuan-Hsun Huang<sup>1</sup>, Kuan-Liang Liu<sup>1</sup>, Chia-Yu Hsu<sup>1</sup>, Ming-Yu Fang<sup>1</sup>, Yu-Chen Huang<sup>1</sup>, Tsu-An Hsu<sup>1</sup>, Chiung-Tong Chen<sup>1</sup>, Lun Kelvin Tsou<sup>\*1</sup>

<sup>1</sup> Institute of Biotechnology and Pharmaceutical Research, National Health Research Institutes, Miaoli 35053, Taiwan, ROC

<sup>2</sup> Institute of Molecular and Genomic Medicine, National Health Research Institutes, Miaoli 35053, Taiwan, ROC

Correspondence and requests for materials should be addressed to L.K.T.  
(kelvintsou@nhri.edu.tw)

#### **Table of Contents**

|                                                                          |       |
|--------------------------------------------------------------------------|-------|
| Supporting Figure 1 .....                                                | 2-3   |
| Copies of <sup>1</sup> H NMR, <sup>13</sup> C NMR and mass spectra ..... | 4 -27 |

### Zn8\_DM1: 0H VS. 24H in plasma.

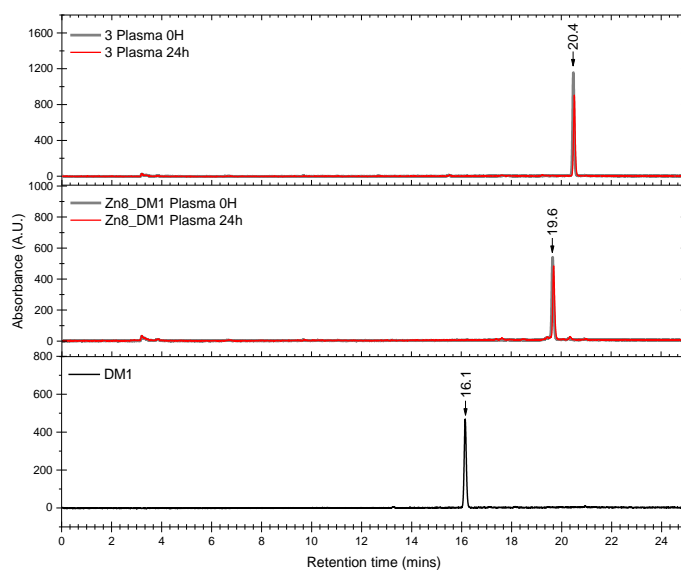

### Zn10\_DM4: 0H VS. 24H in plasma.

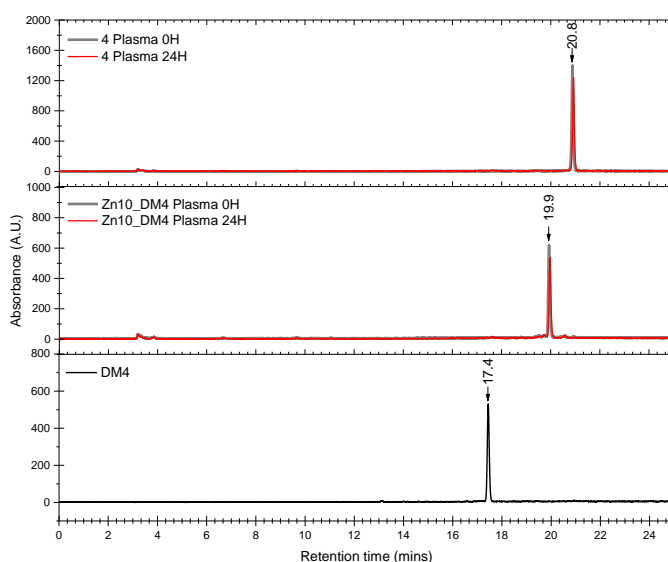

**Supporting Figure S1.** Incubation of Linker-drug 3 and 4, conjugates Zn8\_DM1 and Zn10\_DM4, DM1 and DM4 with plasma for 24 hrs. HPLC condition is listed below.

### HPLC Information

Agilent 1100 HPLC was utilized in this project. Detailed chromatographic conditions used for purity analysis are listed in Table S1.

**Table S1.** Chromatographic conditions and parameters

| Parameters          | Value                                      |
|---------------------|--------------------------------------------|
| Column              | Thermo hypersil GOLD 250*4.6 particle: 5µm |
| Mobile Phase        | A: 0.1% TFA in H <sub>2</sub> O ; B: MeOH  |
| Gradient table      | Time(min) % B                              |
|                     | 0 10                                       |
|                     | 2 10                                       |
|                     | 6 50                                       |
|                     | 16 90                                      |
|                     | 17 90                                      |
| Flow rate           | 0.5 ml/min                                 |
| Injection volume    | 10µL                                       |
| Detector wavelength | UV at 254 nm                               |
| Run time            | 25 min                                     |
| Post time           | 6 min                                      |
| Column temperature  | RT                                         |
| Sample temperature  | RT                                         |

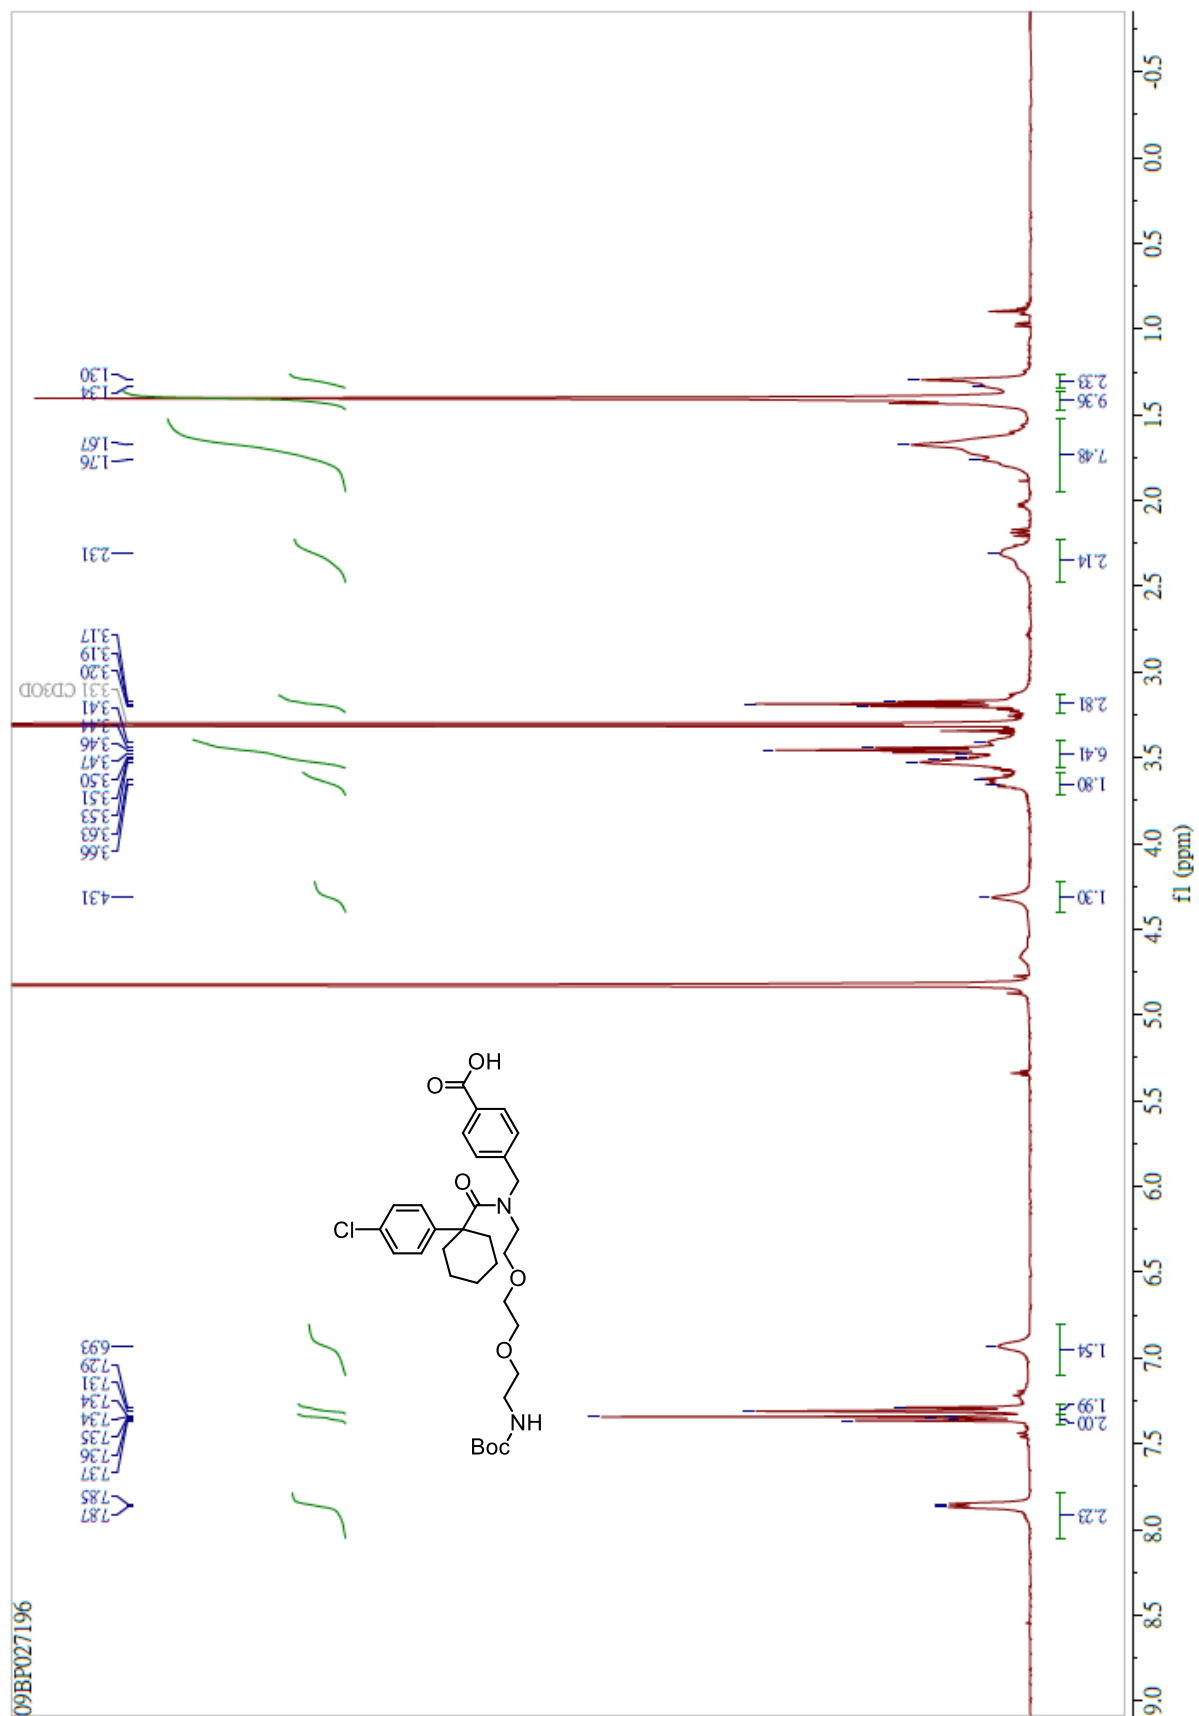

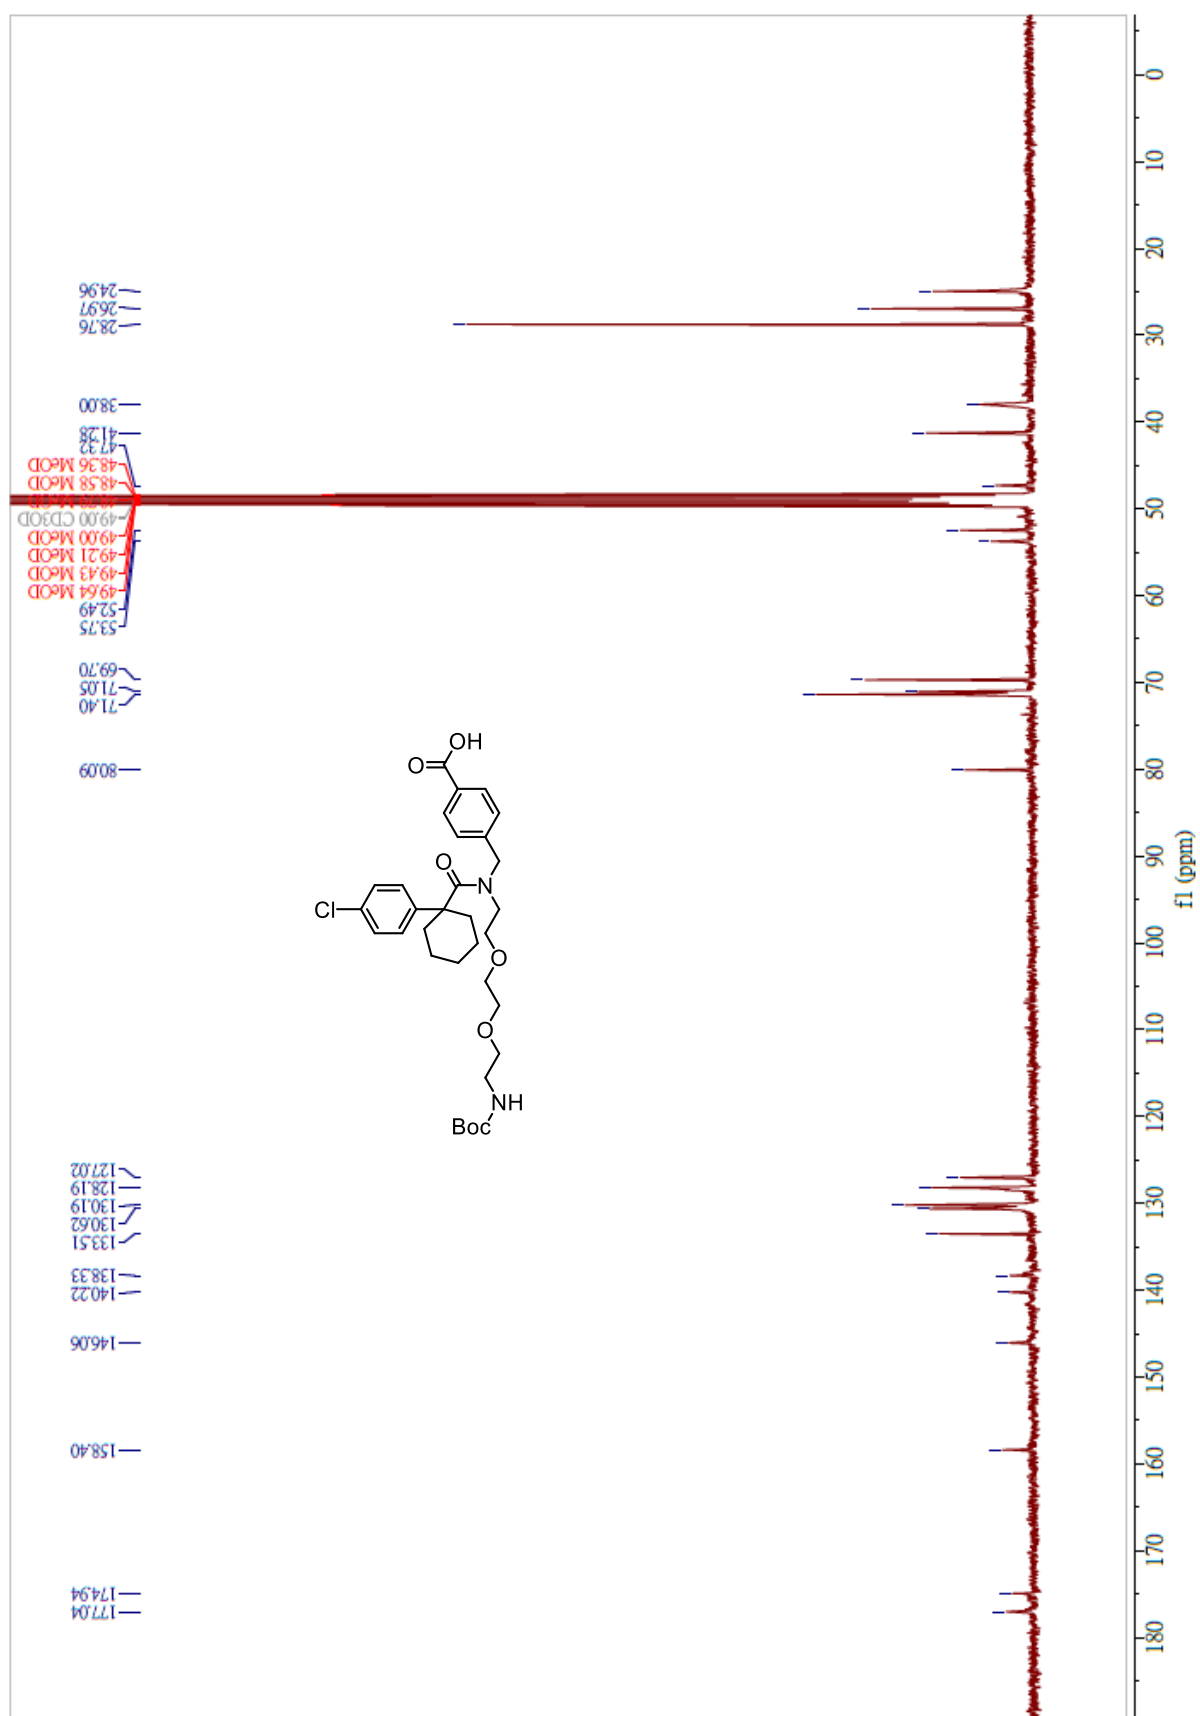

# Acquisition Parameter

|             |          |                      |          |                  |           |
|-------------|----------|----------------------|----------|------------------|-----------|
| Source Type | ESI      | Ion Polarity         | Positive | Set Nebulizer    | 1.0 Bar   |
| Focus       | Active   | Set Capillary        | 4500 V   | Set Dry Heater   | 200 °C    |
| Scan Begin  | 50 m/z   | Set End Plate Offset | -500 V   | Set Dry Gas      | 6.0 l/min |
| Scan End    | 1500 m/z | Set Charging Voltage | 2000 V   | Set Divert Valve | Waste     |
|             |          | Set Corona           | 0 nA     | Set APCI Heater  | 0 °C      |

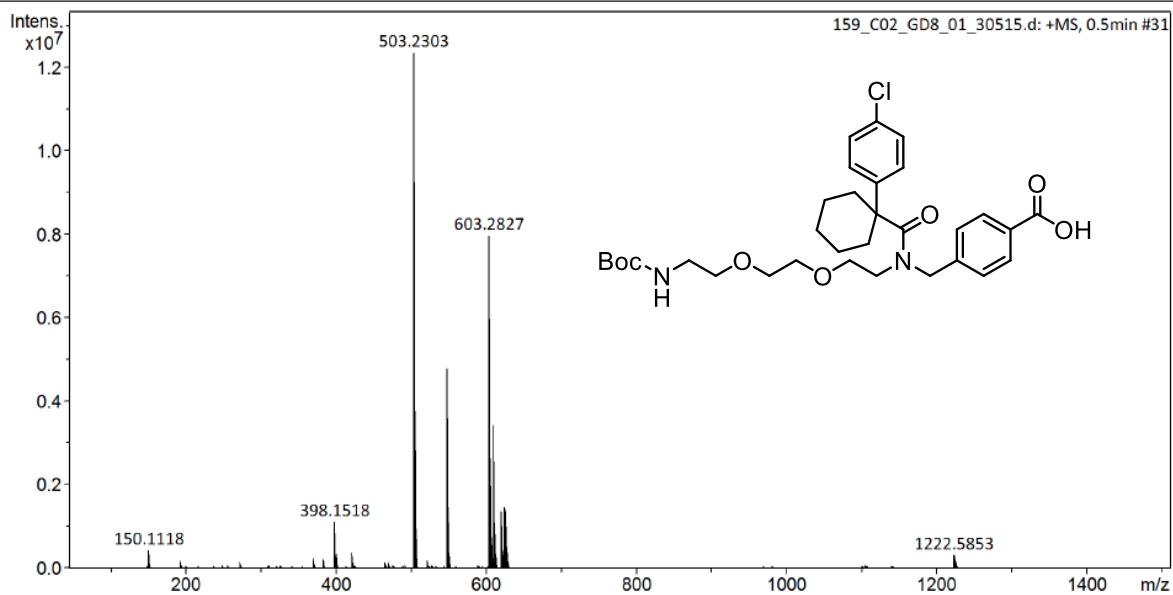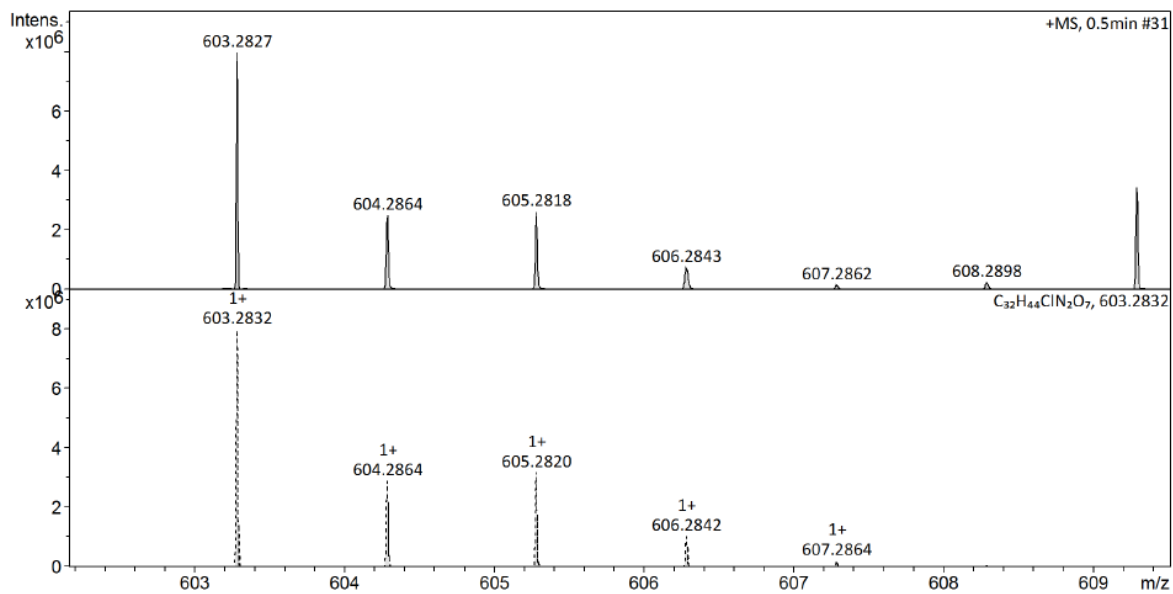

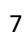





|             |          |                      |          |                  |           |
|-------------|----------|----------------------|----------|------------------|-----------|
| Source Type | ESI      | Ion Polarity         | Positive | Set Nebulizer    | 1.0 Bar   |
| Focus       | Active   | Set Capillary        | 4500 V   | Set Dry Heater   | 200 °C    |
| Scan Begin  | 50 m/z   | Set End Plate Offset | -500 V   | Set Dry Gas      | 6.0 l/min |
| Scan End    | 1500 m/z | Set Charging Voltage | 2000 V   | Set Divert Valve | Waste     |
|             |          | Set Corona           | 0 nA     | Set APCI Heater  | 0 °C      |

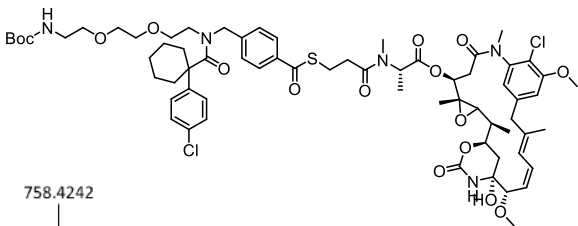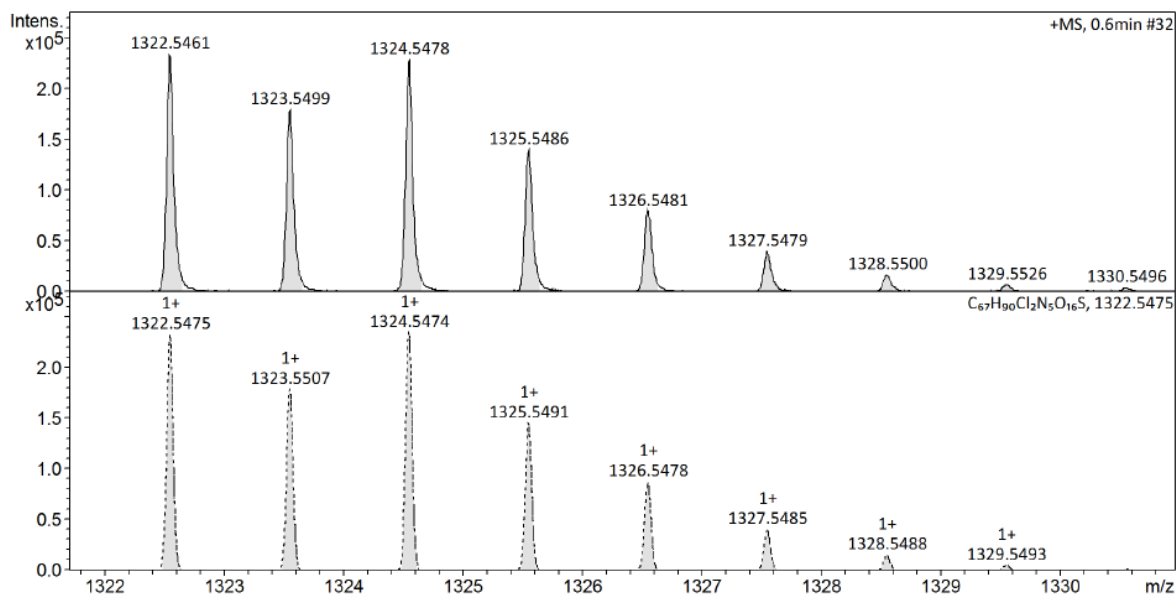

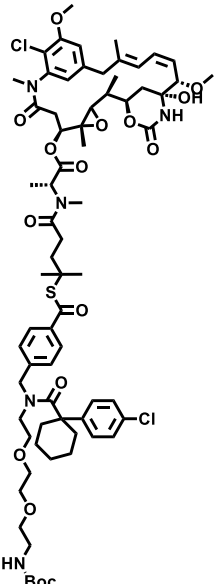

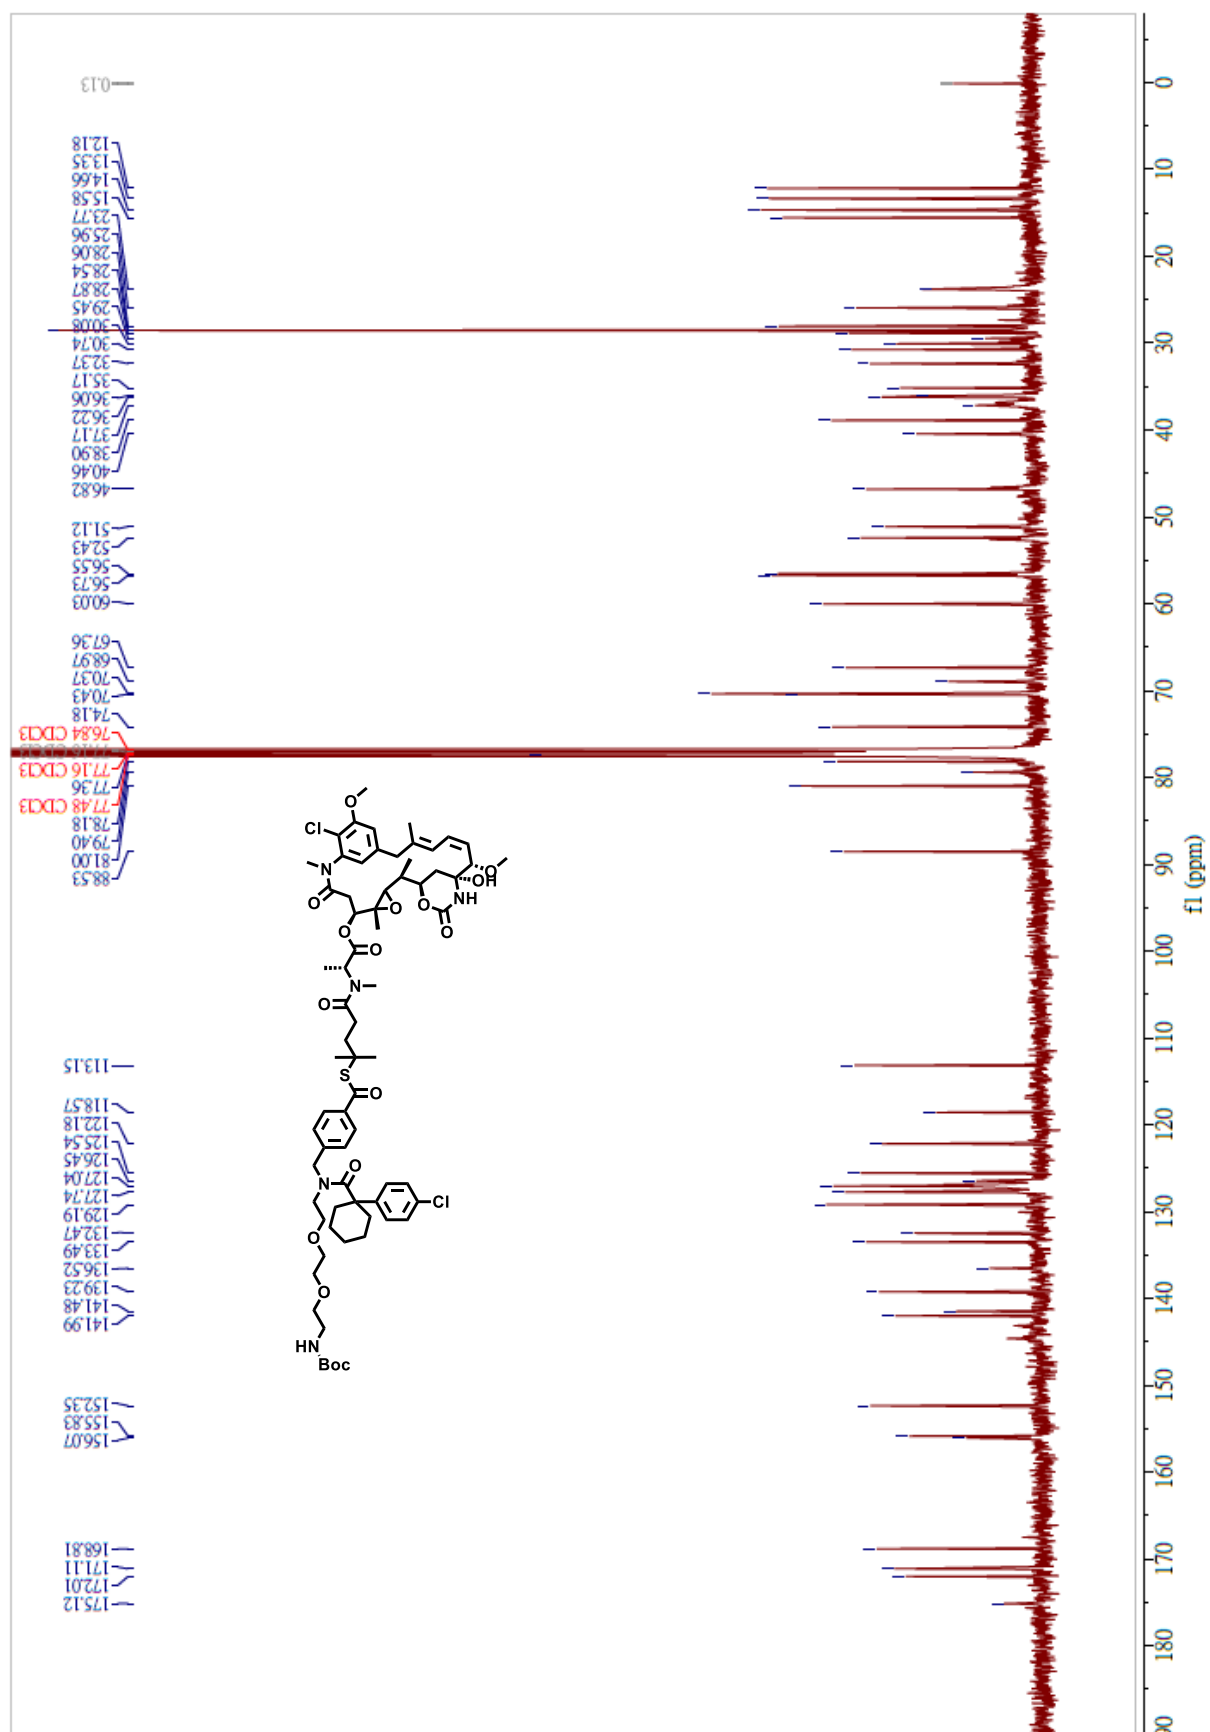

| Acquisition Parameters |          |                      |          |                  |           |
|------------------------|----------|----------------------|----------|------------------|-----------|
| Source Type            | ESI      | Ion Polarity         | Positive | Set Nebulizer    | 1.0 Bar   |
| Focus                  | Active   | Set Capillary        | 4500 V   | Set Dry Heater   | 200 °C    |
| Scan Begin             | 50 m/z   | Set End Plate Offset | -500 V   | Set Dry Gas      | 6.0 l/min |
| Scan End               | 1500 m/z | Set Charging Voltage | 2000 V   | Set Divert Valve | Waste     |
|                        |          | Set Corona           | 0 nA     | Set APCI Heater  | 0 °C      |

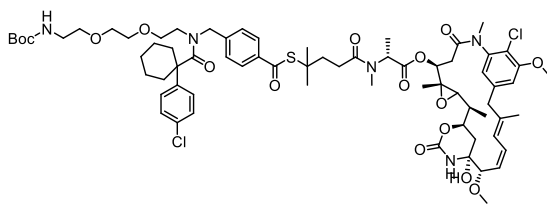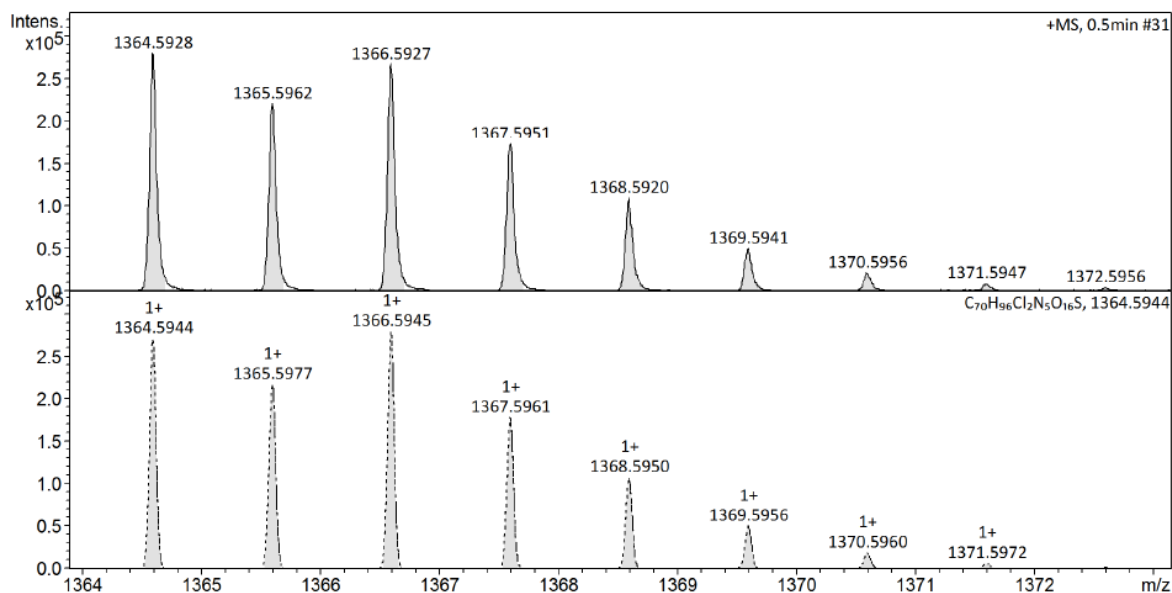

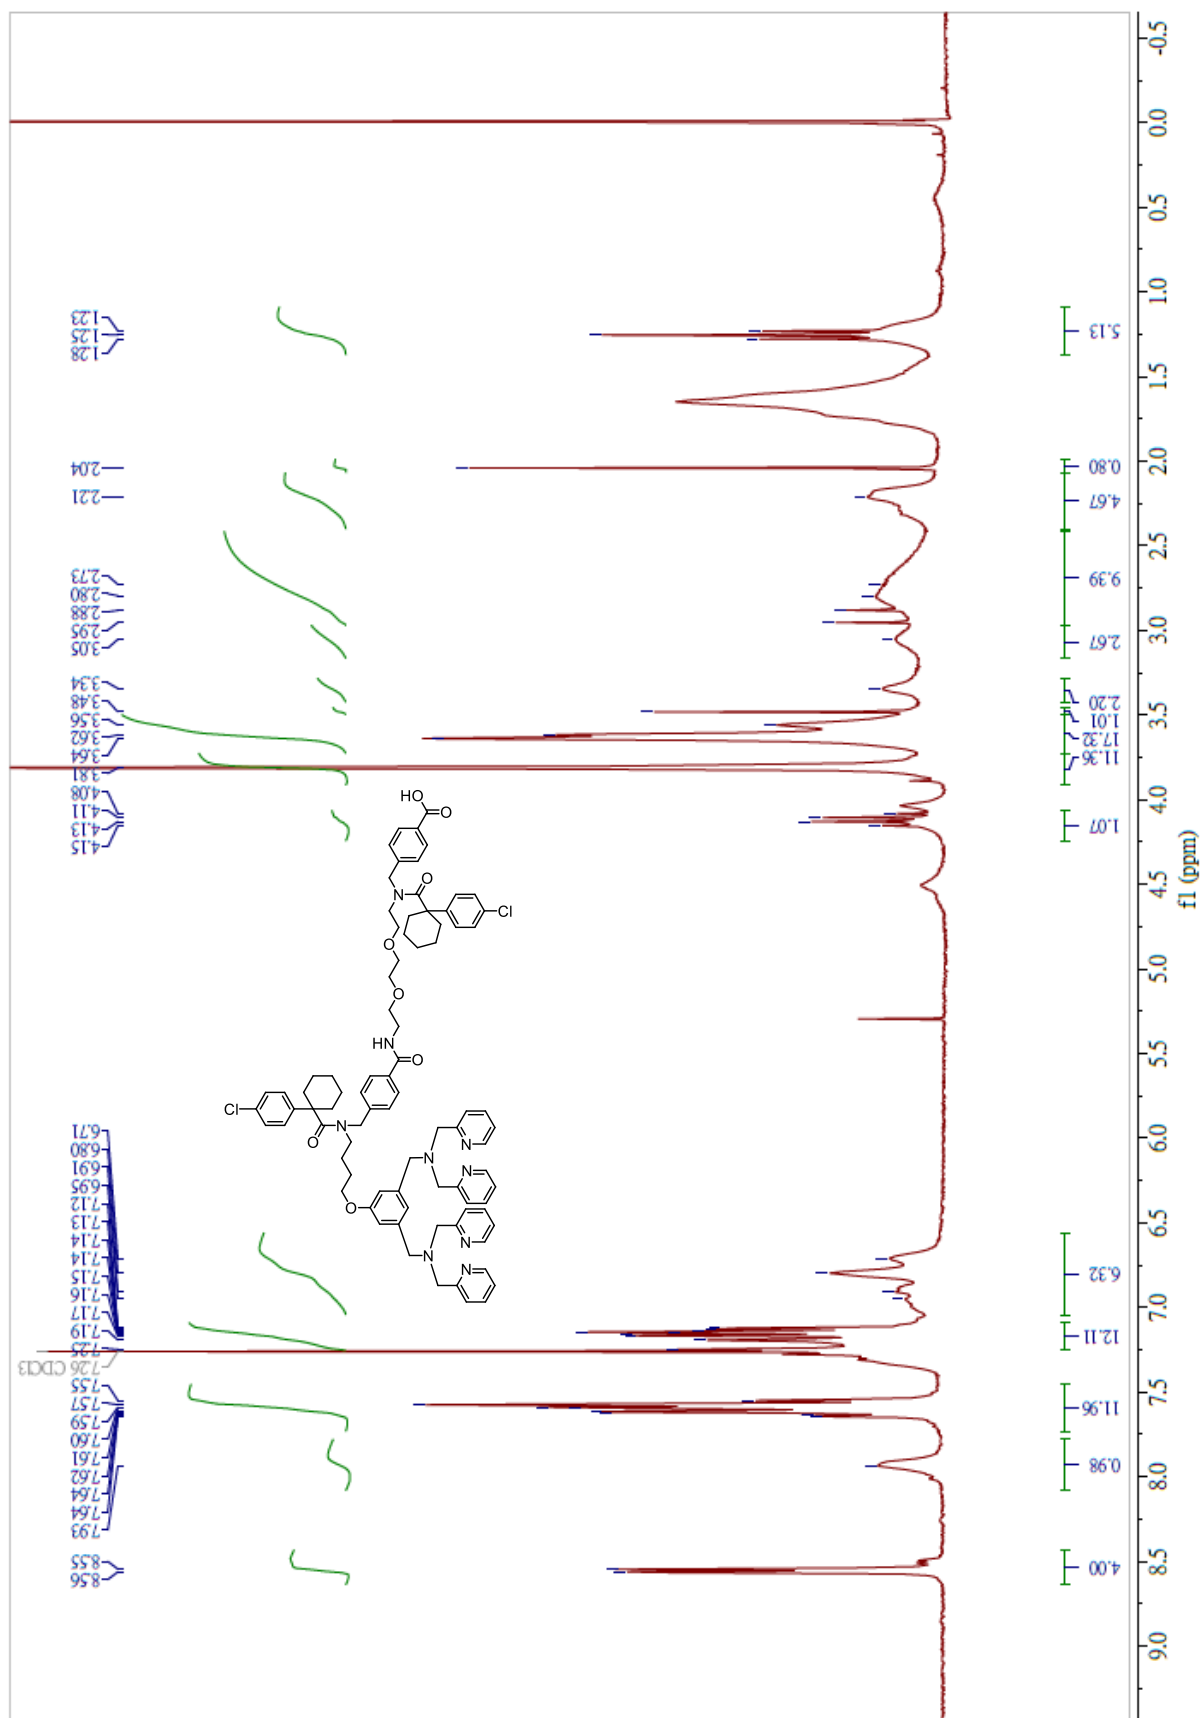

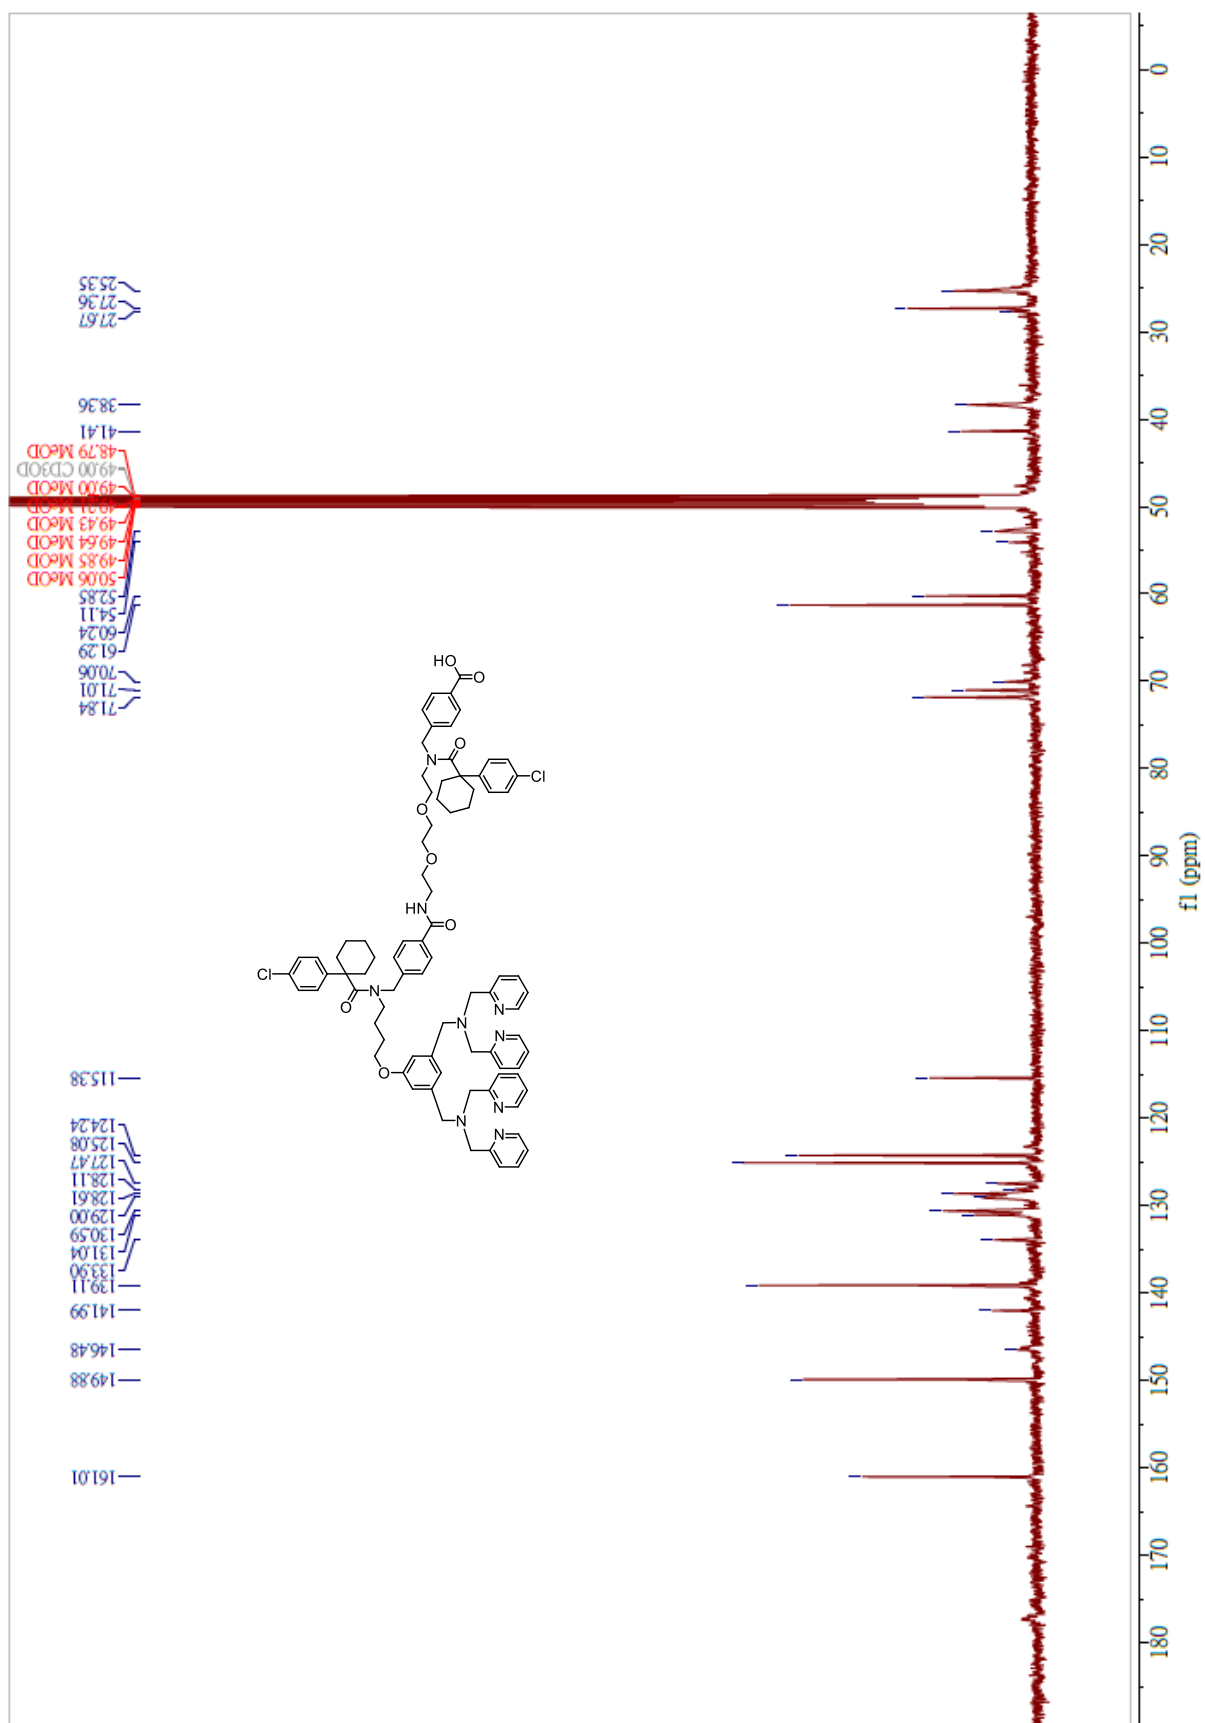

Charge number:1 Tolerance:150.00[ppm], 100.00 .. 100.... Unsaturation Number:-200.5 .. 300.0 (...  
 Element:<sup>12</sup>C:84 .. 84, <sup>1</sup>H:0 .. 94, <sup>35</sup>Cl:2 .. 2, <sup>14</sup>N:9 .. 9, <sup>23</sup>Na:0 .. 2, <sup>16</sup>O:8 .. 8

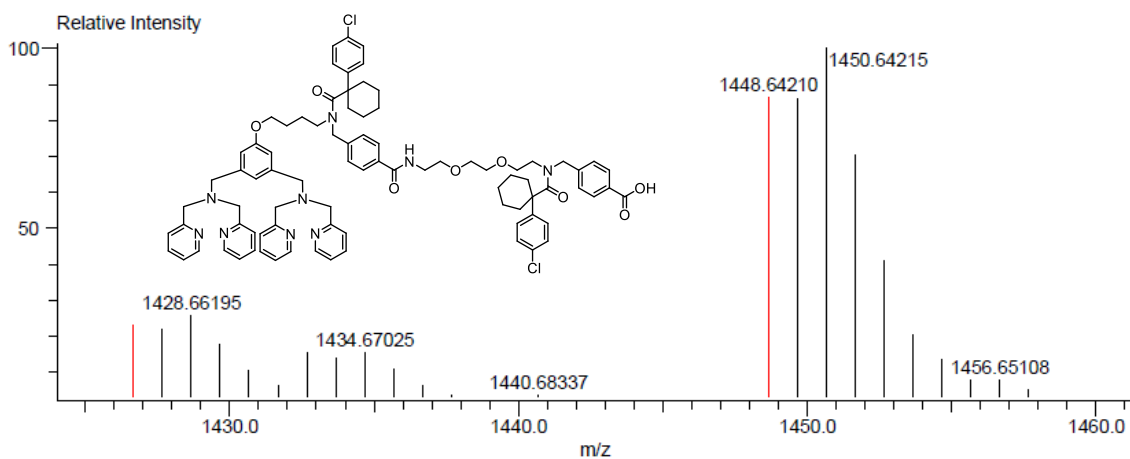

| Mass       | Intensity | Calc. Mass | Mass Difference [ppm] | Possible Formula                                                                                                                                                                 |
|------------|-----------|------------|-----------------------|----------------------------------------------------------------------------------------------------------------------------------------------------------------------------------|
| 1426.66139 | 28257.29  | 1426.66024 | 0.81                  | <sup>12</sup> C <sub>84</sub> <sup>1</sup> H <sub>94</sub> <sup>35</sup> Cl <sub>2</sub> <sup>14</sup> N <sub>9</sub> <sup>16</sup> O <sub>8</sub>                               |
| 1448.64210 | 106156.39 | 1448.64218 | -0.06                 | <sup>12</sup> C <sub>84</sub> <sup>1</sup> H <sub>93</sub> <sup>35</sup> Cl <sub>2</sub> <sup>14</sup> N <sub>9</sub> <sup>23</sup> Na <sub>1</sub> <sup>16</sup> O <sub>8</sub> |

10BP055002

<sup>1</sup>H NMR spectrum (CDCl<sub>3</sub>) of compound 10BP055002. The x-axis represents the chemical shift in ppm, ranging from 0.78 to 8.49. The spectrum shows several peaks, with integration values indicated below the baseline. A broad peak at 1.62 ppm is labeled H<sub>2</sub>O. A sharp peak at 7.26 ppm is labeled CDCl<sub>3</sub>. The chemical structure of the compound is shown above the spectrum.

Chemical structure of 10BP055002:

CC(=O)N[C@@H]1C[C@H](C(=O)N[C@@H]2C[C@H](C(=O)N[C@@H]3C[C@H](C(=O)N[C@@H]4C[C@H](C(=O)N[C@@H]5C[C@H](C(=O)N[C@@H]6C[C@H](C(=O)N[C@@H]7C[C@H](C(=O)N[C@@H]8C[C@H](C(=O)N[C@@H]9C[C@H](C(=O)N[C@@H]10C[C@H](C(=O)N[C@@H]11C[C@H](C(=O)N[C@@H]12C[C@H](C(=O)N[C@@H]13C[C@H](C(=O)N[C@@H]14C[C@H](C(=O)N[C@@H]15C[C@H](C(=O)N[C@@H]16C[C@H](C(=O)N[C@@H]17C[C@H](C(=O)N[C@@H]18C[C@H](C(=O)N[C@@H]19C[C@H](C(=O)N[C@@H]20C[C@H](C(=O)N[C@@H]21C[C@H](C(=O)N[C@@H]22C[C@H](C(=O)N[C@@H]23C[C@H](C(=O)N[C@@H]24C[C@H](C(=O)N[C@@H]25C[C@H](C(=O)N[C@@H]26C[C@H](C(=O)N[C@@H]27C[C@H](C(=O)N[C@@H]28C[C@H](C(=O)N[C@@H]29C[C@H](C(=O)N[C@@H]30C[C@H](C(=O)N[C@@H]31C[C@H](C(=O)N[C@@H]32C[C@H](C(=O)N[C@@H]33C[C@H](C(=O)N[C@@H]34C[C@H](C(=O)N[C@@H]35C[C@H](C(=O)N[C@@H]36C[C@H](C(=O)N[C@@H]37C[C@H](C(=O)N[C@@H]38C[C@H](C(=O)N[C@@H]39C[C@H](C(=O)N[C@@H]40C[C@H](C(=O)N[C@@H]41C[C@H](C(=O)N[C@@H]42C[C@H](C(=O)N[C@@H]43C[C@H](C(=O)N[C@@H]44C[C@H](C(=O)N[C@@H]45C[C@H](C(=O)N[C@@H]46C[C@H](C(=O)N[C@@H]47C[C@H](C(=O)N[C@@H]48C[C@H](C(=O)N[C@@H]49C[C@H](C(=O)N[C@@H]50C[C@H](C(=O)N[C@@H]51C[C@H](C(=O)N[C@@H]52C[C@H](C(=O)N[C@@H]53C[C@H](C(=O)N[C@@H]54C[C@H](C(=O)N[C@@H]55C[C@H](C(=O)N[C@@H]56C[C@H](C(=O)N[C@@H]57C[C@H](C(=O)N[C@@H]58C[C@H](C(=O)N[C@@H]59C[C@H](C(=O)N[C@@H]60C[C@H](C(=O)N[C@@H]61C[C@H](C(=O)N[C@@H]62C[C@H](C(=O)N[C@@H]63C[C@H](C(=O)N[C@@H]64C[C@H](C(=O)N[C@@H]65C[C@H](C(=O)N[C@@H]66C[C@H](C(=O)N[C@@H]67C[C@H](C(=O)N[C@@H]68C[C@H](C(=O)N[C@@H]69C[C@H](C(=O)N[C@@H]70C[C@H](C(=O)N[C@@H]71C[C@H](C(=O)N[C@@H]72C[C@H](C(=O)N[C@@H]73C[C@H](C(=O)N[C@@H]74C[C@H](C(=O)N[C@@H]75C[C@H](C(=O)N[C@@H]76C[C@H](C(=O)N[C@@H]77C[C@H](C(=O)N[C@@H]78C[C@H](C(=O)N[C@@H]79C[C@H](C(=O)N[C@@H]80C[C@H](C(=O)N[C@@H]81C[C@H](C(=O)N[C@@H]82C[C@H](C(=O)N[C@@H]83C[C@H](C(=O)N[C@@H]84C[C@H](C(=O)N[C@@H]85C[C@H](C(=O)N[C@@H]86C[C@H](C(=O)N[C@@H]87C[C@H](C(=O)N[C@@H]88C[C@H](C(=O)N[C@@H]89C[C@H](C(=O)N[C@@H]90C[C@H](C(=O)N[C@@H]91C[C@H](C(=O)N[C@@H]92C[C@H](C(=O)N[C@@H]93C[C@H](C(=O)N[C@@H]94C[C@H](C(=O)N[C@@H]95C[C@H](C(=O)N[C@@H]96C[C@H](C(=O)N[C@@H]97C[C@H](C(=O)N[C@@H]98C[C@H](C(=O)N[C@@H]99C[C@H](C(=O)N[C@@H]100C[C@H](C(=O)N[C@@H]101C[C@H](C(=O)N[C@@H]102C[C@H](C(=O)N[C@@H]103C[C@H](C(=O)N[C@@H]104C[C@H](C(=O)N[C@@H]105C[C@H](C(=O)N[C@@H]106C[C@H](C(=O)N[C@@H]107C[C@H](C(=O)N[C@@H]108C[C@H](C(=O)N[C@@H]109C[C@H](C(=O)N[C@@H]110C[C@H](C(=O)N[C@@H]111C[C@H](C(=O)N[C@@H]112C[C@H](C(=O)N[C@@H]113C[C@H](C(=O)N[C@@H]114C[C@H](C(=O)N[C@@H]115C[C@H](C(=O)N[C@@H]116C[C@H](C(=O)N[C@@H]117C[C@H](C(=O)N[C@@H]118C[C@H](C(=O)N[C@@H]119C[C@H](C(=O)N[C@@H]120C[C@H](C(=O)N[C@@H]121C[C@H](C(=O)N[C@@H]122C[C@H](C(=O)N[C@@H]123C[C@H](C(=O)N[C@@H]124C[C@H](C(=O)N[C@@H]125C[C@H](C(=O)N[C@@H]126C[C@H](C(=O)N[C@@H]127C[C@H](C(=O)N[C@@H]128C[C@H](C(=O)N[C@@H]129C[C@H](C(=O)N[C@@H]130C[C@H](C(=O)N[C@@H]131C[C@H](C(=O)N[C@@H]132C[C@H](C(=O)N[C@@H]133C[C@H](C(=O)N[C@@H]134C[C@H](C(=O)N[C@@H]135C[C@H](C(=O)N[C@@H]136C[C@H](C(=O)N[C@@H]137C[C@H](C(=O)N[C@@H]138C[C@H](C(=O)N[C@@H]139C[C@H](C(=O)N[C@@H]140C[C@H](C(=O)N[C@@H]141C[C@H](C(=O)N[C@@H]142C[C@H](C(=O)N[C@@H]143C[C@H](C(=O)N[C@@H]144C[C@H](C(=O)N[C@@H]145C[C@H](C(=O)N[C@@H]146C[C@H](C(=O)N[C@@H]147C[C@H](C(=O)N[C@@H]148C[C@H](C(=O)N[C@@H]149C[C@H](C(=O)N[C@@H]150C[C@H](C(=O)N[C@@H]151C[C@H](C(=O)N[C@@H]152C[C@H](C(=O)N[C@@H]153C[C@H](C(=O)N[C@@H]154C[C@H](C(=O)N[C@@H]155C[C@H](C(=O)N[C@@H]156C[C@H](C(=O)N[C@@H]157C[C@H](C(=O)N[C@@H]158C[C@H](C(=O)N[C@@H]159C[C@H](C(=O)N[C@@H]160C[C@H](C(=O)N[C@@H]161C[C@H](C(=O)N[C@@H]162C[C@H](C(=O)N[C@@H]163C[C@H](C(=O)N[C@@H]164C[C@H](C(=O)N[C@@H]165C[C@H](C(=O)N[C@@H]166C[C@H](C(=O)N[C@@H]167C[C@H](C(=O)N[C@@H]168C[C@H](C(=O)N[C@@H]169C[C@H](C(=O)N[C@@H]170C[C@H](C(=O)N[C@@H]171C[C@H](C(=O)N[C@@H]172C[C@H](C(=O)N[C@@H]173C[C@H](C(=O)N[C@@H]174C[C@H](C(=O)N[C@@H]175C[C@H](C(=O)N[C@@H]176C[C@H](C(=O)N[C@@H]177C[C@H](C(=O)N[C@@H]178C[C@H](C(=O)N[C@@H]179C[C@H](C(=O)N[C@@H]180C[C@H](C(=O)N[C@@H]181C[C@H](C(=O)N[C@@H]182C[C@H](C(=O)N[C@@H]183C[C@H](C(=O)N[C@@H]184C[C@H](C(=O)N[C@@H]185C[C@H](C(=O)N[C@@H]186C[C@H](C(=O)N[C@@H]187C[C@H](C(=O)N[C@@H]188C[C@H](C(=O)N[C@@H]189C[C@H](C(=O)N[C@@H]190C[C@H](C(=O)N[C@@H]191C[C@H](C(=O)N[C@@H]192C[C@H](C(=O)N[C@@H]193C[C@H](C(=O)N[C@@H]194C[C@H](C(=O)N[C@@H]195C[C@H](C(=O)N[C@@H]196C[C@H](C(=O)N[C@@H]197C[C@H](C(=O)N[C@@H]198C[C@H](C(=O)N[C@@H]199C[C@H](C(=O)N[C@@H]200C[C@H](C(=O)N[C@@H]201C[C@H](C(=O)N[C@@H]202C[C@H](C(=O)N[C@@H]203C[C@H](C(=O)N[C@@H]204C[C@H](C(=O)N[C@@H]205C[C@H](C(=O)N[C@@H]206C[C@H](C(=O)N[C@@H]207C[C@H](C(=O)N[C@@H]208C[C@H](C(=O)N[C@@H]209C[C@H](C(=O)N[C@@H]210C[C@H](C(=O)N[C@@H]211C[C@H](C(=O)N[C@@H]212C[C@H](C(=O)N[C@@H]213C[C@H](C(=O)N[C@@H]214C[C@H](C(=O)N[C@@H]215C[C@H](C(=O)N[C@@H]216C[C@H](C(=O)N[C@@H]217C[C@H](C(=O)N[C@@H]218C[C@H](C(=O)N[C@@H]219C[C



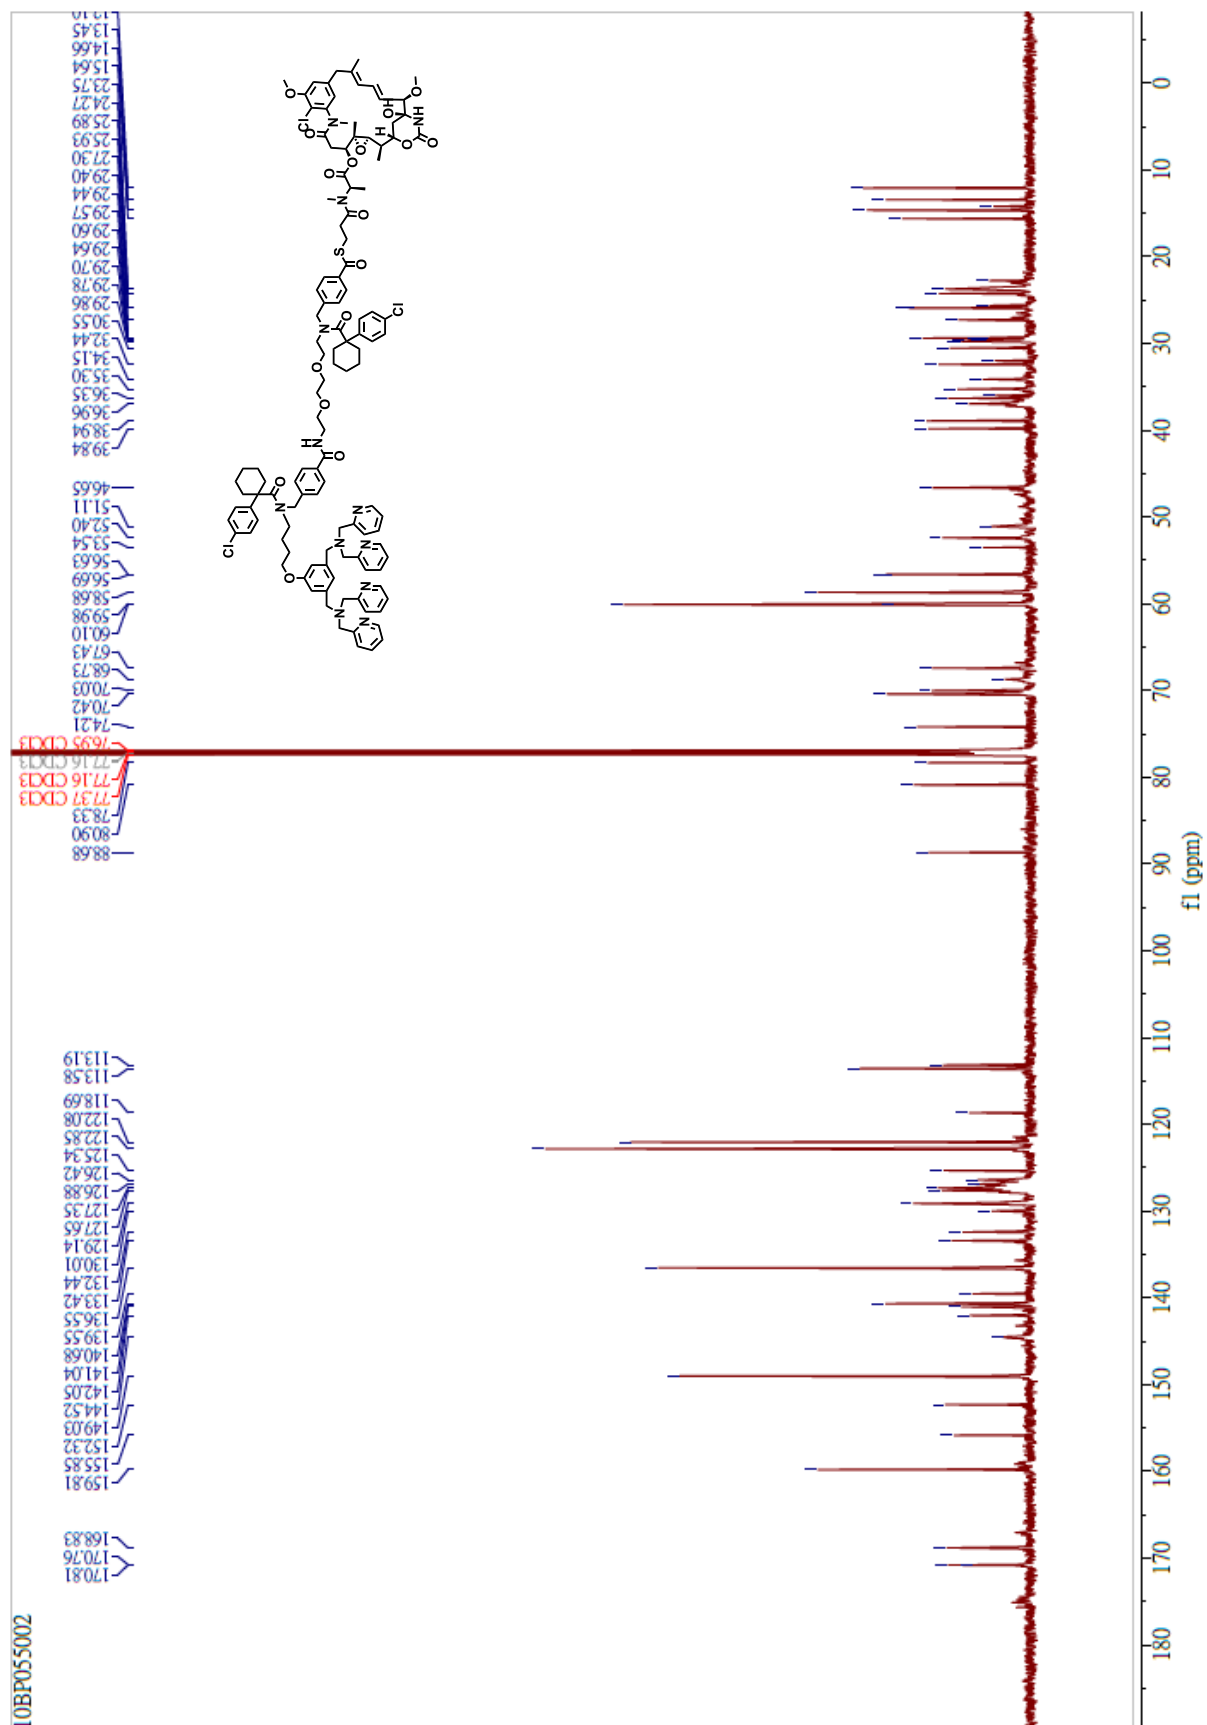

Charge number:1 Tolerance:300.00[ppm], 250.00 .. 250.... Unsaturation Number:-100.0 .. 200.0 (...  
 Element:<sup>12</sup>C:119 .. 119, <sup>1</sup>H:0 .. 140, <sup>35</sup>Cl:3 .. 3, <sup>14</sup>N:12 .. 12, <sup>23</sup>Na:0 .. 1, <sup>16</sup>O:17 .. 17, <sup>32</sup>S:1 .. 1

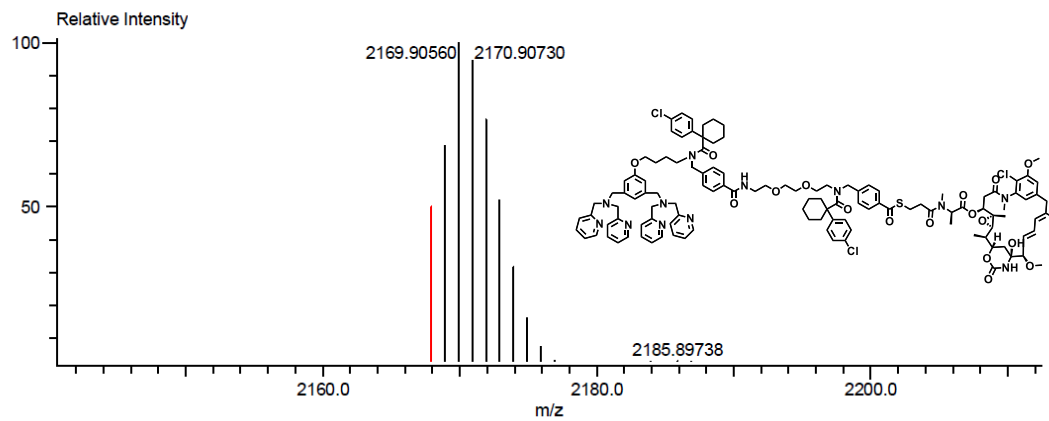

| Mass       | Intensity | Calc. Mass | Mass Difference [mDa] | Mass Difference [ppm] |
|------------|-----------|------------|-----------------------|-----------------------|
| 2167.90420 | 54324.13  | 2167.90651 | -2.31                 | -1.06                 |

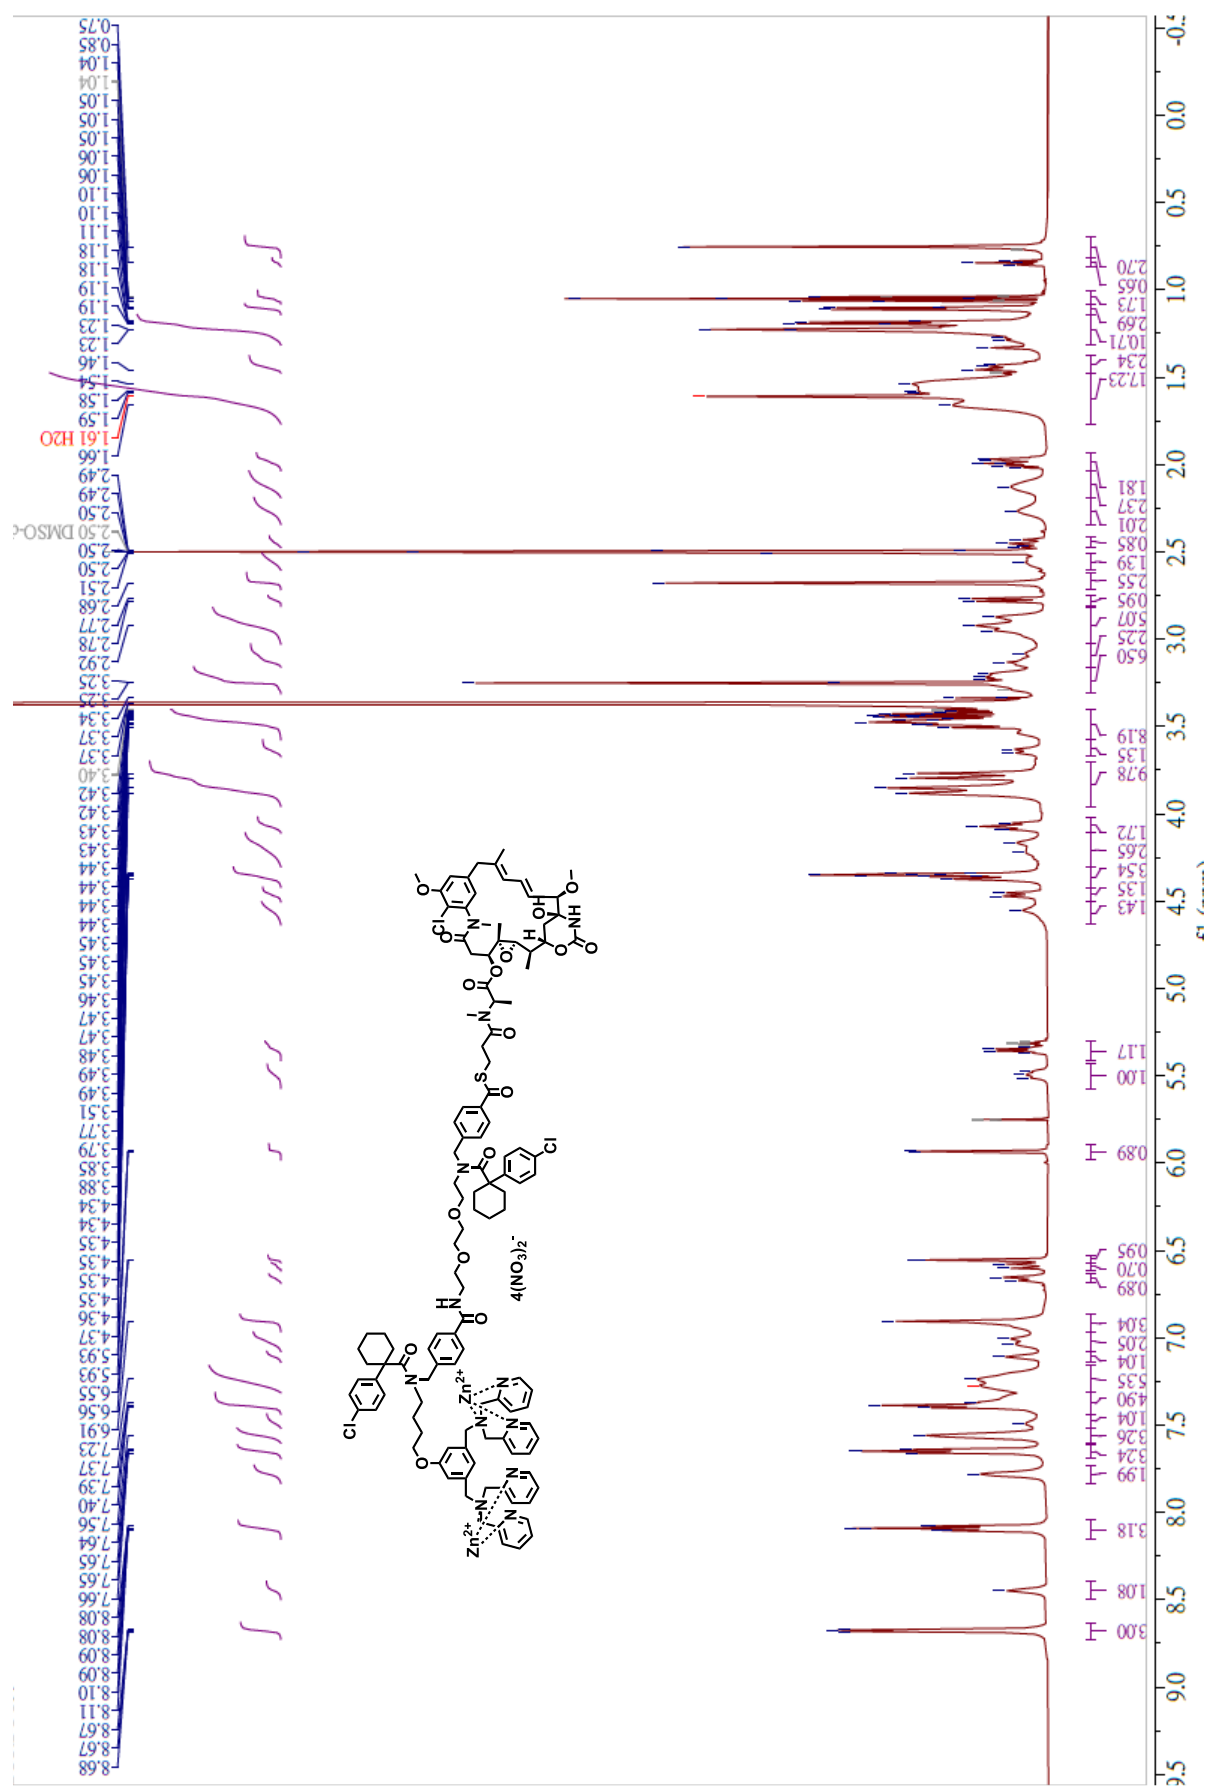

BPRDP159\_13C

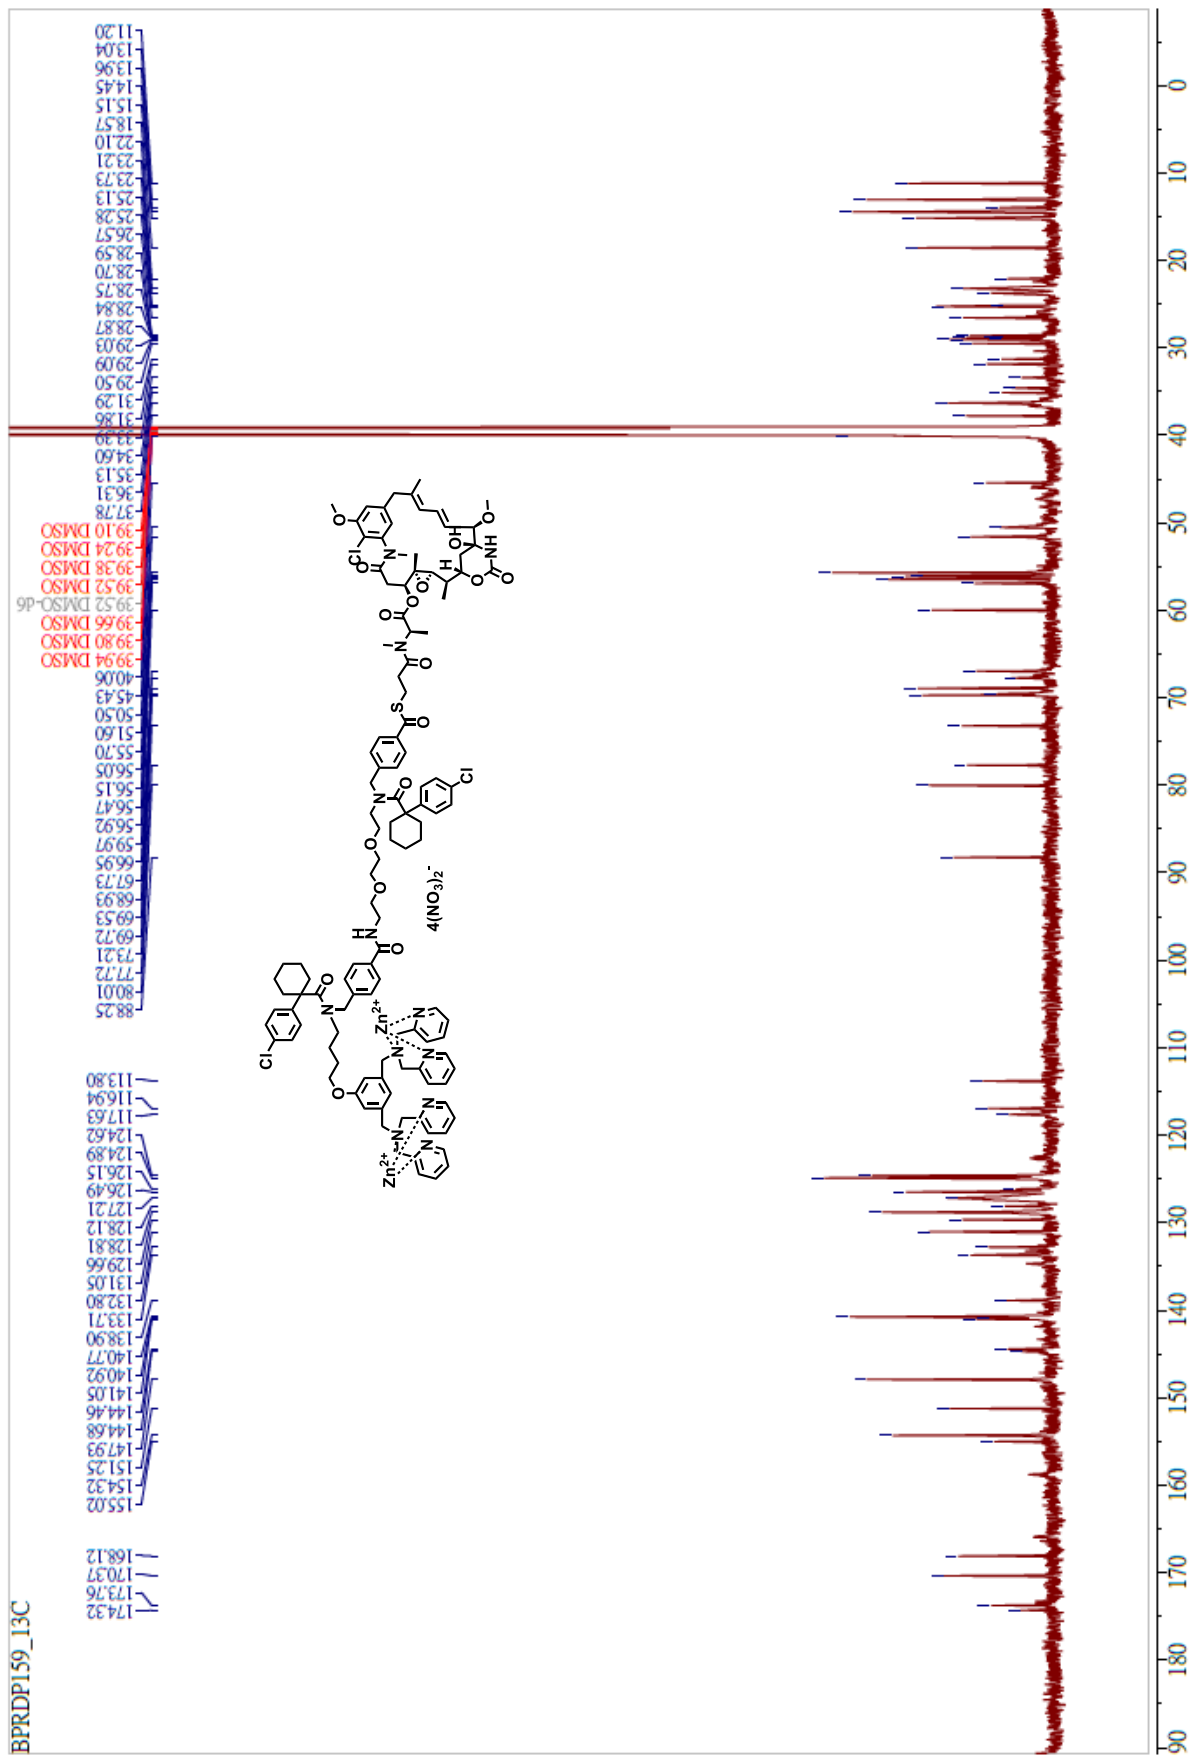

# Acquisition Parameter

|             |          |                      |          |                  |           |
|-------------|----------|----------------------|----------|------------------|-----------|
| Source Type | ESI      | Ion Polarity         | Positive | Set Nebulizer    | 1.0 Bar   |
| Focus       | Active   | Set Capillary        | 4500 V   | Set Dry Heater   | 200 °C    |
| Scan Begin  | 50 m/z   | Set End Plate Offset | -500 V   | Set Dry Gas      | 6.0 l/min |
| Scan End    | 3000 m/z | Set Charging Voltage | 2000 V   | Set Divert Valve | Waste     |
|             |          | Set Corona           | 0 nA     | Set APCI Heater  | 0 °C      |

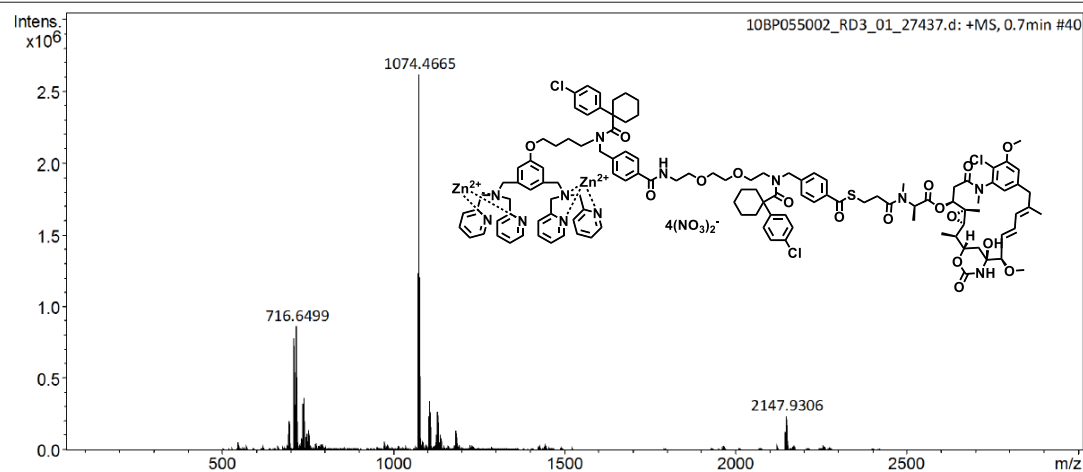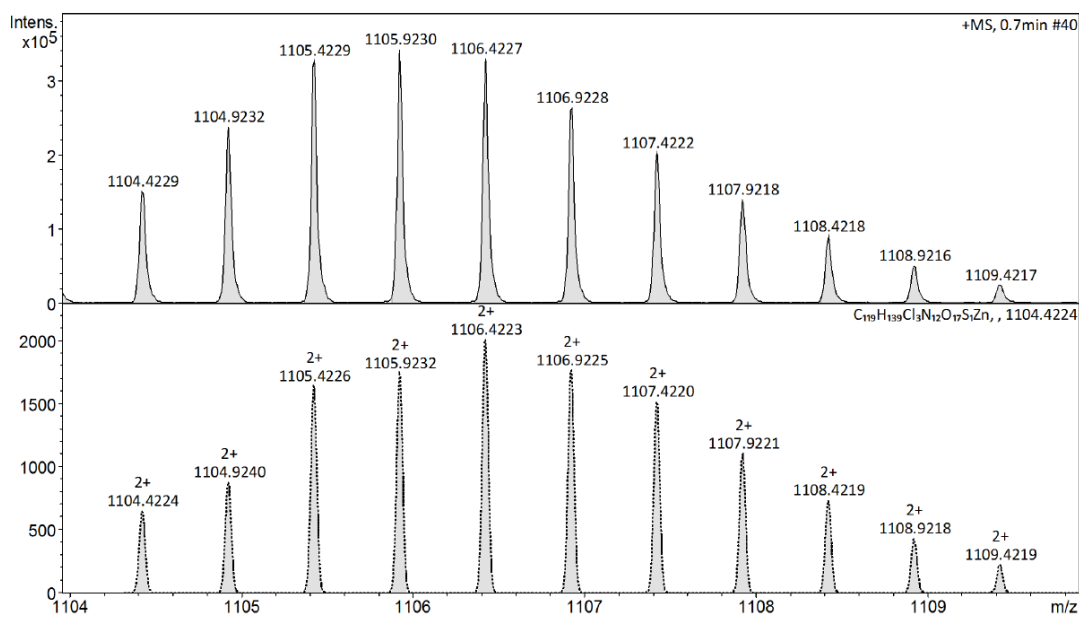

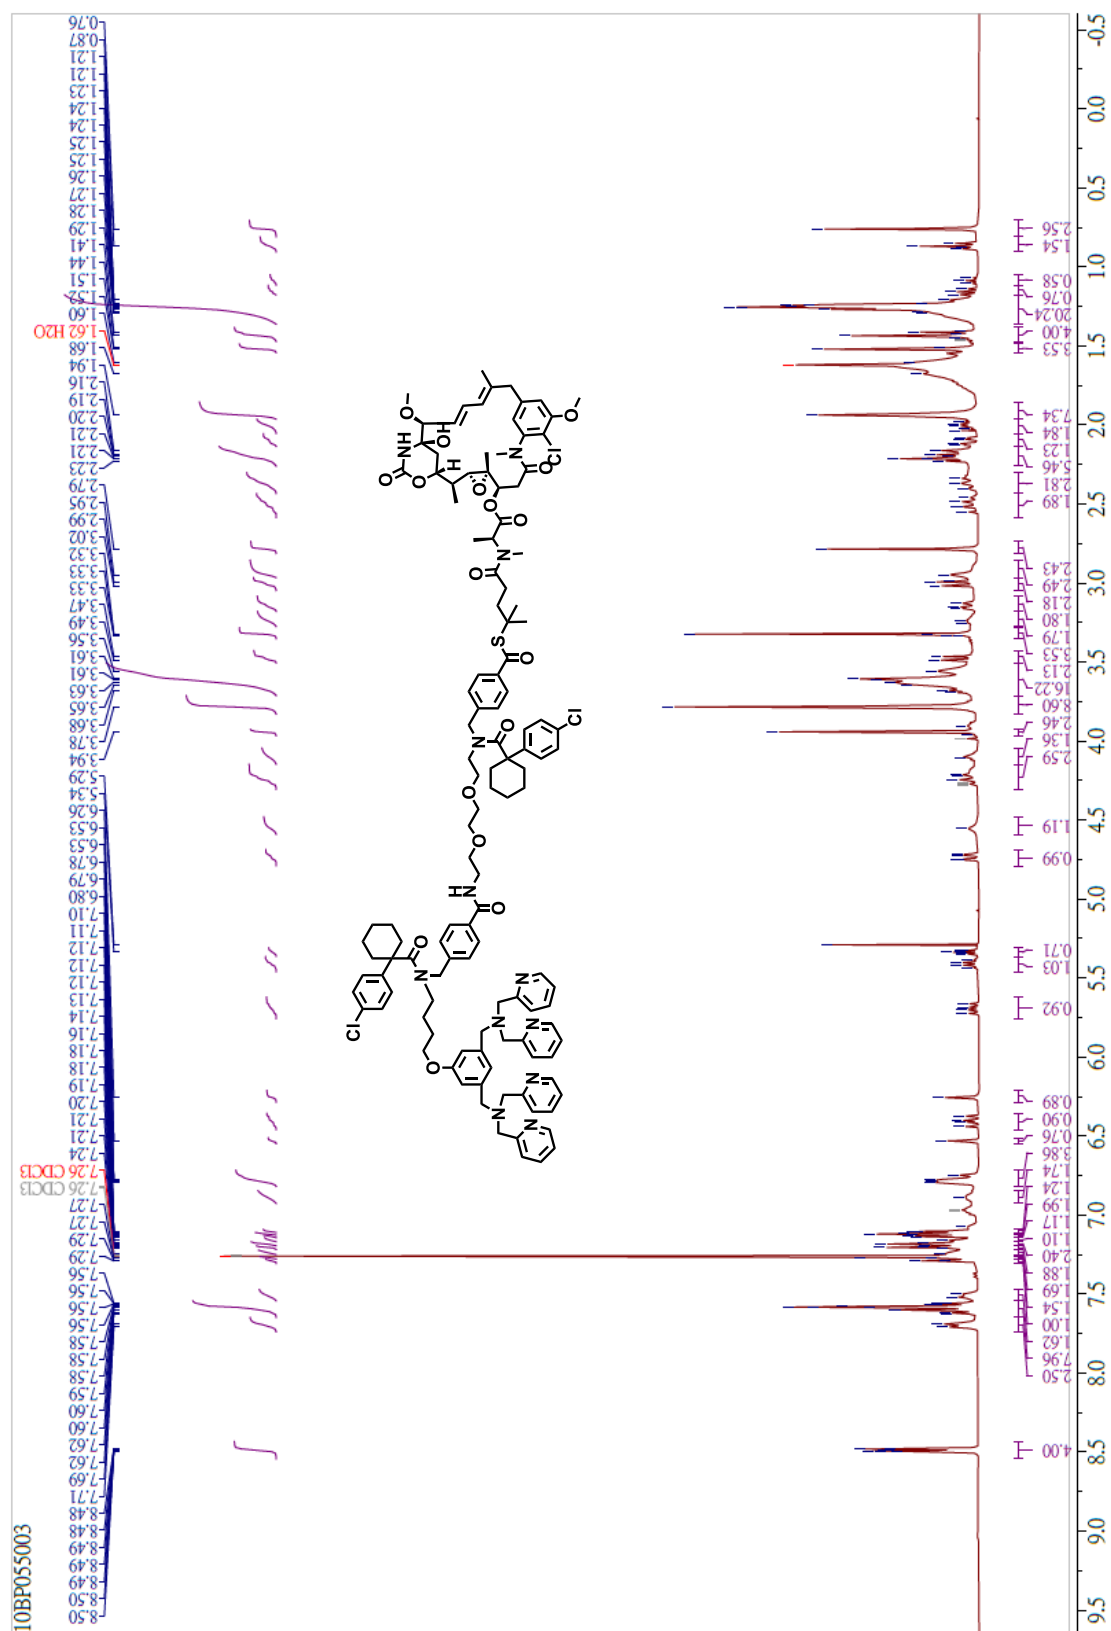

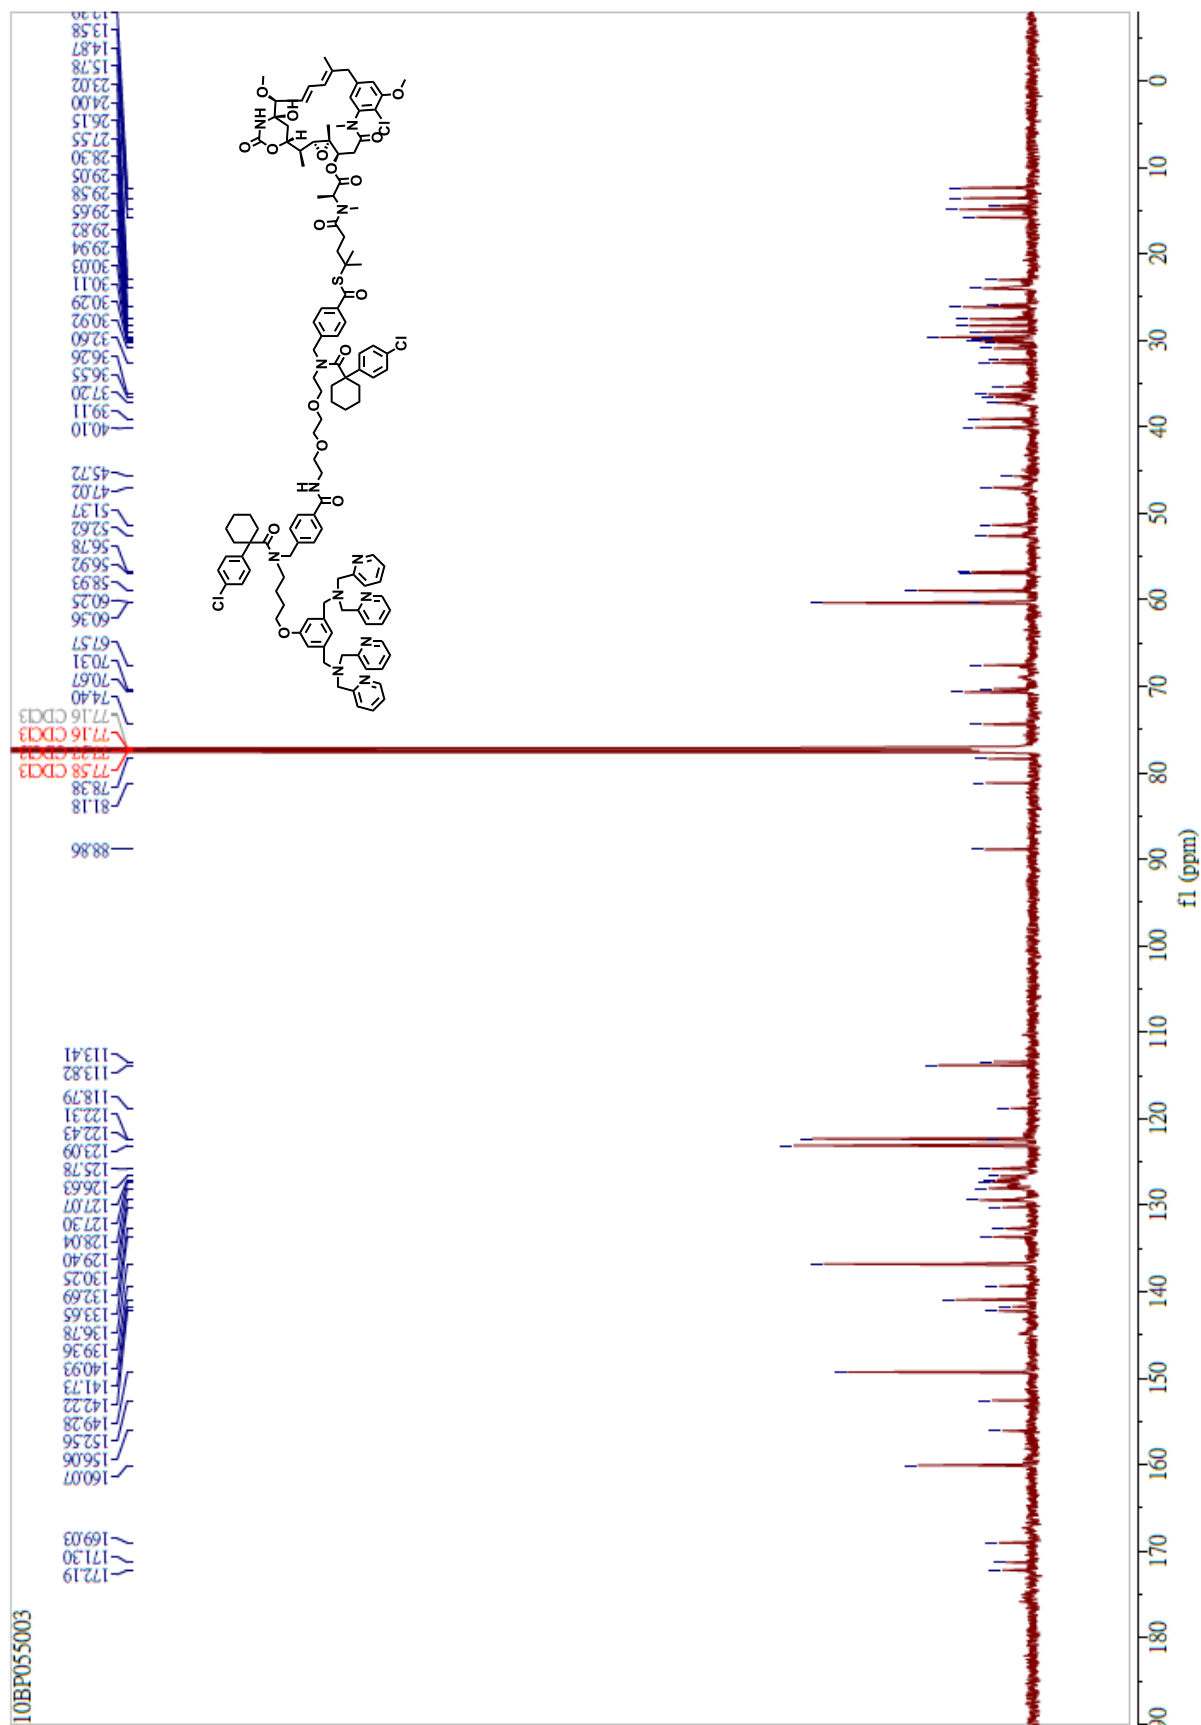

Charge number:1 Tolerance:300.00[ppm], 250.00 .. 250.... Unsaturation Number:-100.0 .. 200.0 (...  
 Element:<sup>12</sup>C:122 .. 122, <sup>1</sup>H:0 .. 146, <sup>35</sup>Cl:3 .. 3, <sup>14</sup>N:12 .. 12, <sup>23</sup>Na:0 .. 1, <sup>16</sup>O:17 .. 17, <sup>32</sup>S:1 .. 1

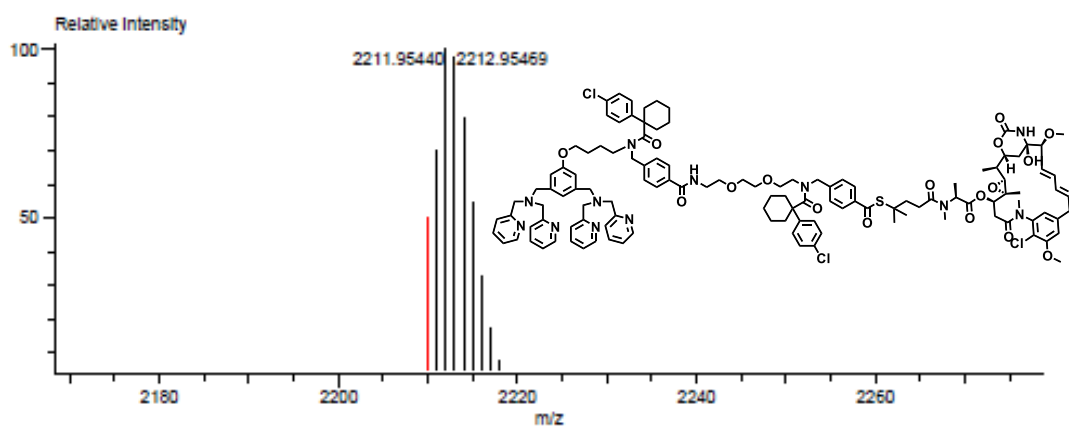

| Mass       | Intensity | Calc. Mass | Mass Difference<br>[mDa] | Mass Difference<br>[ppm] |
|------------|-----------|------------|--------------------------|--------------------------|
| 2209.95189 | 25511.96  | 2209.95348 | -1.57                    | -0.71                    |



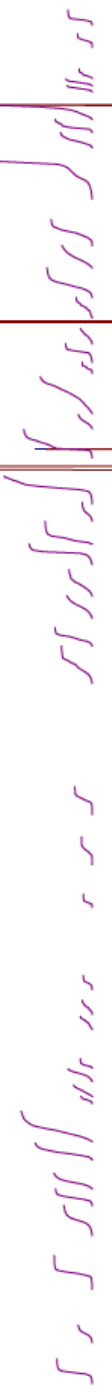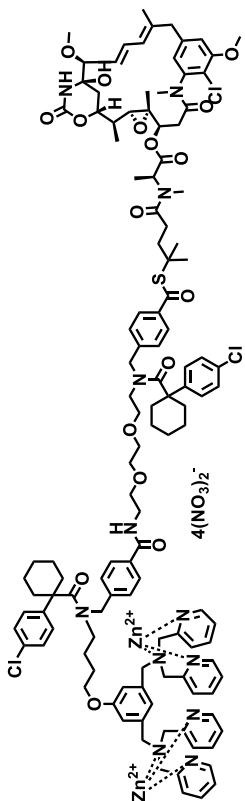

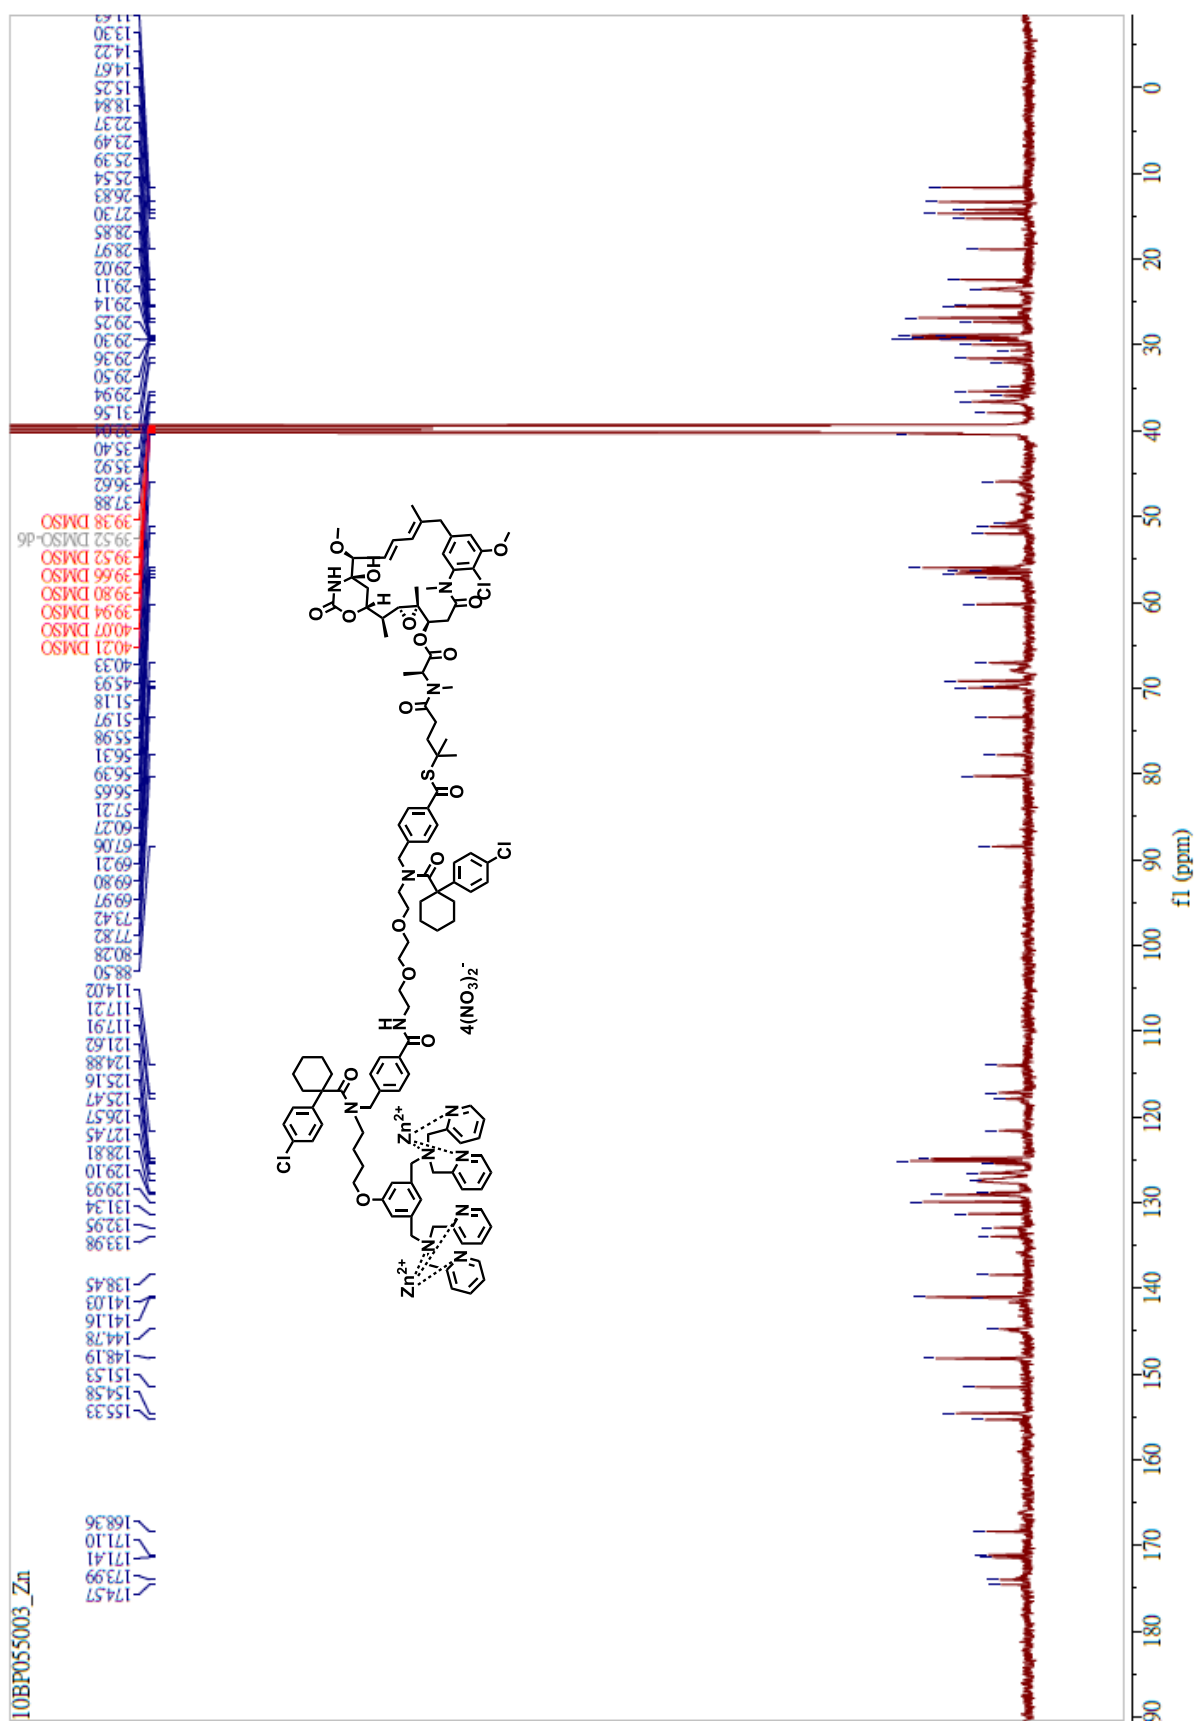

# Acquisition Parameter

|             |          |                      |          |                  |           |
|-------------|----------|----------------------|----------|------------------|-----------|
| Source Type | ESI      | Ion Polarity         | Positive | Set Nebulizer    | 1.0 Bar   |
| Focus       | Active   | Set Capillary        | 4500 V   | Set Dry Heater   | 200 °C    |
| Scan Begin  | 50 m/z   | Set End Plate Offset | -500 V   | Set Dry Gas      | 6.0 l/min |
| Scan End    | 3000 m/z | Set Charging Voltage | 2000 V   | Set Divert Valve | Waste     |
|             |          | Set Corona           | 0 nA     | Set APCI Heater  | 0 °C      |

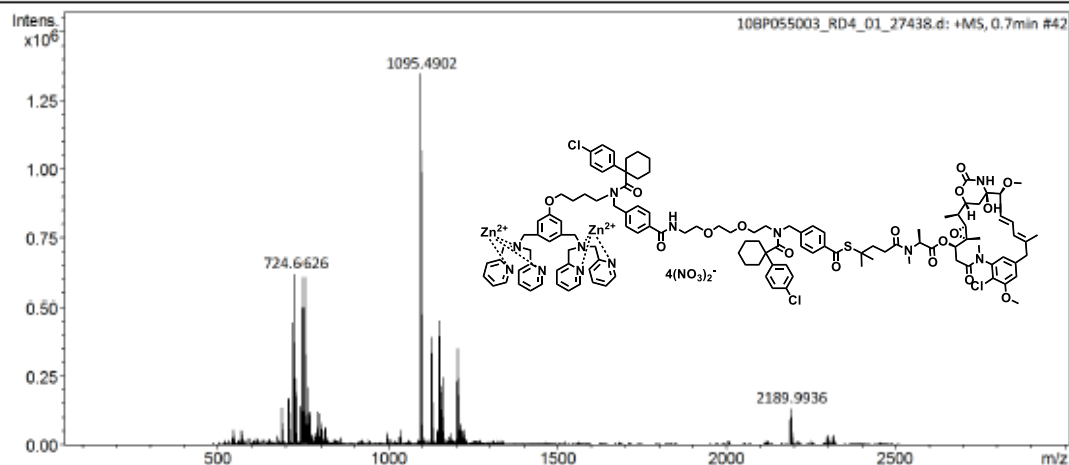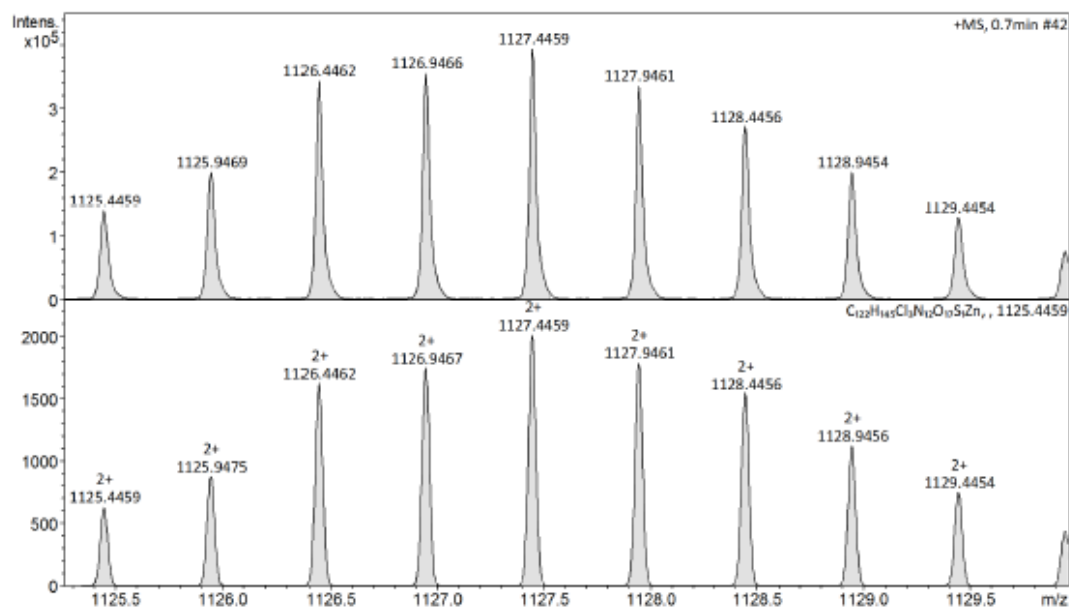

Supplement: s1 [file s1]
